# Supplementary material
Source: PubMed Central journal article supplement (PMC2701048)
Supplement: 0900617106_0900617106SI.pdf [file 0900617106_0900617106SI.pdf]

# Supporting Information

Minami et al. 10.1073/pnas.0900617106

## SI Text

**CE-MS-Based Metabolite-Timetable Method with More Stringent Criterion.** As described in the main text, CE-MS analysis detected 953 peaks from blood plasma samples. Among these peaks, 44 peaks exhibit significant circadian oscillations under more stringent oscillation criterion (FDR <0.01, Fig. S3E). Ten peaks, corresponding to 22.7% of these peaks of circadian oscillations, were identified as known metabolites (Fig. S3F). Based on these detected and/or identified time-indicating metabolites by CE-MS analysis, we can construct the metabolite timetable in mice blood plasma (see Table S3).

To verify the possibility that this metabolite timetable well represent BT of individuals, we attempted to estimate the BT from the metabolite profiles of independently sampled mice. We assessed the metabolite profiles of fresh blood plasma from individual young male CBA/N mice every 4 h over 24 h both under LD or DD conditions (Fig. S3 G and H). As expected, we can significantly detect circadian rhythmicity in all metabolite profiles of these samples ( $P < 0.01$ , Fig. S3 G and H). The estimated BT closely matched with the sampling time with the estimation errors,  $1.5 \pm 0.76$  h for LD condition and  $1.4 \pm 0.90$  h for DD condition (mean  $\pm$  SD). These results suggest that the CE-MS-based method, with the time-indicating metabolites selected by the same stringent criterion (FDR < 0.01) as the LC-MS-based method, can accurately detect the internal BT of independently sampled individuals (Table S4).

**Possible Mechanisms to Generate Circadian Oscillations of Metabolites.** In this study, we found many oscillatory metabolites in mice blood by LC-MS (176 peaks for negative ions and 142 peaks for positive ions) and by CE-MS (153 peaks for positive ions). There are possible mechanisms to generate circadian oscillations of metabolites. The first possible mechanism is the regulation of the physiological input (e.g., food intake) and output (e.g., behavioral activity) by circadian clock. Through these regulations, the metabolites are rhythmically supplied, and/or rhythmically consumed in the body. The second possibility is the direct regulation of the key regulatory enzymes of the target metabolic pathways by circadian clock. For example, circadian clock system can regulate transcription of key enzymes via clock-controlled elements including E-box, DBP-binding element (D-box) and Rev-erb/ROR binding element (RRE) (1, 2). Posttranscriptional regulation of these enzymes may be included in this possibility. The third possibility would be more indirect/additional effects on the metabolism by the circadian clock. Circadian clock controls many physiological phenomena like hormonal secretions. For example, secreted hormones can also regulate endogenous metabolites state rhythmically.

**The Possible Tissue Sources of the Circadian Oscillations of Blood Metabolites and the Possible Mechanisms to Generate the Biased Distribution of Their Phase.** Strictly speaking, there is no single internal body time because different tissues have different internal time with phase differences. Therefore, it is worthwhile to discuss about the possible tissue sources to generate the circadian rhythmicity of metabolites in blood. As we discussed in the main text, we found in LC-MS analysis that lysophosphatidylcholine exhibited significant circadian oscillations in mice blood, which might be generated by circadian oscillations of a key enzyme synthesizing lysophosphatidylcholine, *Lipc* (hepatic lipase) in the liver (3). We note that *Lipc* mRNA are rhythmically expressed in the mouse liver with the peak time around PT5 (3),

which slightly proceeds with the peak time of identified oscillatory lysophosphatidylcholines (PT 5.8-PT 9.1). In CE-MS analysis, we found that metabolites in urea cycle exhibit circadian oscillations. Urea generation is one of the main functions in liver. We note that mRNA of *Asl*, which represents the gene for key enzyme involved in urea generation, is rhythmically expressed in the mouse liver with the peak time around PT18 (3). Reddy et al. (4) reported that protein levels of CPS1, ASS1, and ARG1 show circadian rhythmicity. ASS1 converts citrulline to argininosuccinate and the CPS acts as the rate-limiting step in ureagenesis by converting ammonia to carbamoyl phosphate. According to their data, ASS1 and CPS peaked during circadian night when nocturnal feeding and digestion would present amino acids to the hepatocytes, whereas ARG1, the final stage before urea production, peaked later in circadian day, when digestion would have been complete (4). According to these results, the contribution of the liver seems important for generating circadian oscillations of the blood metabolites. We also note that observed distribution of peak time of blood metabolites converges into 2 phases (i.e., around midday and around midnight). This might be because specific metabolic pathways are controlled by circadian clocks. Actually, as we discussed in the above, the identified metabolites in LC-MS and CE-MS are involved in a few specific pathways such as lysophosphatidylcholine pathway peaking around midday (Fig. 1), and urea cycles and glycine-threonine metabolism peaking around midnight (Fig. S4B). Further assignment of the oscillatory peaks to known metabolites should contribute to unveil the mechanism to generate circadian oscillations of blood metabolites and the biased distribution of their phase.

**Why We Focused on Cosine-Wave-Like Metabolites.** In this study, we focused on cosine-wave-like metabolites by fitting time-course data of blood metabolite concentrations to cosine wave (SI Materials and Methods). This is because the estimation of peak time of circadian metabolites of cosine-wave form is not affected by the time points in the construction of molecular timetable (if these are of 4-h time intervals). We also note that we calculated a continuous peak time of each oscillatory metabolite from the wave-form of its time-course data. Theoretically speaking, the calculated (continuous) peak time of metabolites do not depend on the time points in the construction of molecular timetable when we focus on the cosine-wave-like metabolite as we did in this study. Therefore, even if the test samples are collected at any time points in-between these time points, it doesn't affect the estimation of body time.

Because we focused only on cosine-wave-like metabolites, we might miss circadian metabolites of noncosine wave form in this study. To find such noncosine-wave-like metabolites, another type of statistical filter will be helpful. For example, the ANOVA test with periodicity test like autocorrelation is 1 possibility. In addition, a more narrow time window (i.e., 1 or 2 h) and/or more long-term (e.g., 3 or 4 days) sampling might be also helpful.

## SI Materials and Method

**Animals.** CBA/N mice were purchased from Japan SLC. Young male or female mice were 5–6 weeks old, and aged male mice were “retired breeders”, aged  $\approx$ 6 months. Male C57BL/6 mice (5–6 weeks old) were purchased from Charles River. All mice were kept under light–dark (LD; light 12 h, dark 12 h) conditions over 2 weeks with food pellets (CRF-1, Charles River) and water given ad libitum. *Cry1*<sup>-/-</sup> and *Cry2*<sup>-/-</sup> mice were originally

generated by A. Y. and G.T.J.v.d.H, and the founder population was transported from Tohoku University to RIKEN CDB, where they were maintained and reproduced.

**Sampling Schedule.** Sampling of mouse plasma was performed under both LD and DD conditions. For DD sampling, the housing condition was changed to constant darkness on the day that sampling began. Sampling was started at ZT0/CT0. Trunk body blood was collected in tubes containing Novoheparin (Mochida Pharm) every 4 h for 2 days (12 samples in total).

Fasted mice were food deprived by removing food pellets from their cages at the light-off point 1 day before sampling began. They were deprived of food until their trunk blood was collected. Sampling began at ZT4 (4 h after light on) and ended at ZT0 the next day (6 time points). Immediately before they were killed, they were weighed to determine how much weight they had lost. To extract the plasma, blood was centrifuged twice at  $1,000 \times g$  for 5 min at 4 °C. Supernatants were withdrawn and stored at -80 °C in a deep-freezer until RIA or metabolome analysis was performed.

**Jet-Lag Experiment.** Young male CBA/N mice were maintained under LD cycles (light 12 h, dark 12 h) for 2 weeks. Then the lighting schedule was shifted by 8 h (day 1). The mice were killed, and trunk blood was collected on days 1, 5, and 14. Their behavior was monitored by an infrared monitoring system (NS-AS01, Neuroscience) and data were visualized with *Clock-Lab* software (Actimetric).

**Corticosterone RIA.** [1,2,6,7-<sup>3</sup>H(N)]-Corticosterone (NET-399, 2.6 TBq/mmol) and the rabbit anticorticosterone serum (FKA-420) were obtained from PerkinElmer Japan and Cosmo Bio, respectively. After the addition of 200  $\mu$ L of the assay buffer (Gel-PBS; 20 mM phosphate buffer containing 0.1% gelatin and 140 mM NaCl), plasma samples (5  $\mu$ L) were extracted with diethylether (1 ml for 2 times). The organic phase was separated from the aqueous phase and evaporated with a vacuum evaporator. The residue was dissolved in 250 microliters of Gel-PBS and 50-microliter aliquots were subjected to RIA. A standard curve (6.25–800 pg/tube) was constructed by using serial 2-fold dilutions of authentic corticosterone (Sigma) dissolved in Gel-PBS. For the initiation of RIA, anticorticosterone serum (1:10,000 dilution with PBS containing 50 mM EDTA, 100  $\mu$ L) and [1,2,6,7-<sup>3</sup>H(N)]-corticosterone ( $\approx$ 10,000 dpm in Gel-PBS, 100  $\mu$ L) were added to test tubes containing Gel-PBS and the standard or samples (200  $\mu$ L in total). After incubation for 24 h at 4 °C, dextran-coated charcoal solution (200  $\mu$ L; Norit SX-3, 0.5 g/L, Wako Pure Chemicals, and 0.05 g/L dextran T-70, Amersham Pharmacia, in 20 mM phosphate buffer containing 140 mM NaCl, 50 mM EDTA, and 0.1% sodium azide, pH 7.5; EDTA-PBS) and incubated for 15 min at 4 °C until centrifugation ( $2,000 \times g$ ) for 15 min at 4 °C. The supernatant was decanted into a scintillation vial (Pony Vial, PerkinElmer Japan) containing 2 mL of scintillant (Clearsol-1, Nakalai Tesque). The tube was capped and mixed, and then the radioactivity was counted in a liquid scintillation counter (Aloka). Parallelism of inhibition curves was proved between serial 2-fold dilution of corticosterone standard and the plasma extract (data not shown). Intra- and interassay coefficients of variation were 7.3% ( $n = 10$ ) and 8.4% ( $n = 16$ ) at the 500 pg/tube level, respectively. The minimum detectable level defined as 2 standard deviations from the buffer control was <62.5 pg/tube. Cross-reactivities of the antiserum according to the manufacturer were as follows: deoxycorticosterone, 4.80%; 11-dehydrocorticosterone, 4.70%; progesterone 5.40%; cortisol, 2.20%; 4-androstenedione, 1.20%; cortisone, 0.23%; 17-hydroxy-11-deoxycorticosterone, 0.19%; 17alpha-hydroxyprogesterone, 0.30%; testosterone, 0.35%; al-

dosterone, pregnenolone, 17alpha-hydroxy-progesterone, dehydroepiandrosterone, and estradiol-17beta, <0.01%.

**LC-MS Samples.** After acetonitrile (225  $\mu$ L) was added, plasma samples were shaken and centrifuged. Supernatants were placed in new tubes and dried. Acetonitrile (25  $\mu$ L) was added to the samples before analyzing the metabolites.

**LC-MS Conditions.** The LC system used was an Agilent 1100 series HPLC (Agilent Technologies). The ZORBAX SB-C18 RRHT ( $\varphi$ 2.1 50 mm, 1.8  $\mu$ m) was purchased from Agilent Technologies, and columns were kept at 60 °C. The mobile phase consisted of 0.1% acetic acid/water as A and methanol as B. The gradient went from 40% B in 0 min, 99% in 20 min, 99% in 30 min, 40% in 30.01 min, and then kept at 40% B until 40 min. The flow rate was 0.2 mL/min, and the injection volume was 1  $\mu$ L. MS data were acquired on a Qstar XL mass spectrometry (Applied Biosystems). Samples were analyzed by both positive and negative ion electrospray mass spectrometry. The MS conditions for positive ions (positive, TOF scan mode) were as follows: spray voltage, 5.5 kilovolts; scan range  $m/z$  250–700; curtain gas, 20 arbitrary units (nitrogen); gas 1, 50 arbitrary unit; gas 2, 50 arbitrary units (500 °C). Declustering potential 1/2 was 50 volts/15 volts. The MS conditions for negative ions (negative ion mode, TOF scan) was almost of the same as positive ion conditions, but the spray voltage was -4.5 kilovolts and declustering potential 1/2 was -50 volts/-15 volts.

**LC-MS/MS Conditions.** We performed LC-MS/MS for associating oscillatory peaks to known chemicals as described in the previous report (5) with little modified. The LC system used was an Agilent 1100 series HPLC (Agilent Technologies) and the mobile phase consisted of 0.1% acetic acid/water as A and methanol as B. MS data were acquired on a Qstar XL mass spectrometry (Applied Biosystems).

**CE-MS Samples.** To select oscillatory substances, pooled mouse plasma (4–10 mice per time point) was used; individual mouse plasma was used for BT measurement. Plasma samples (100  $\mu$ L) were plunged into 1.8 mL of methanol containing 55  $\mu$ M each methionine sulfone and 2-Morpholinoethanesulfonic acid (Mes) and mixed well. Then 800  $\mu$ L of deionized water and 2 mL of chloroform were added, and the solution was centrifuged at  $2,500 \times g$  for 5 min at 4 °C. The 800- $\mu$ L upper aqueous layer was centrifugally filtered through a Millipore 5-kDa cutoff filter to remove proteins. The filtrate was lyophilized and dissolved in 50  $\mu$ L of Milli-Q water containing reference compounds (200  $\mu$ M each of 3-aminopyrrolidine and trimesate) before CE-TOFMS analysis.

**Metabolite Standards for CE-MS.** All chemical standards were obtained from common commercial sources and dissolved in Milli-Q (Millipore) water, 0.1 N HCl or 0.1 N NaOH to obtain 10 or 100 mM stock solutions. Working standard mixtures were prepared by diluting stock solutions with Milli-Q water immediately before injection into the CE-TOFMS. The chemicals used were of analytical or reagent grade.

**Instrumentation for CE-MS.** All CE-TOFMS experiments were performed using an Agilent CE capillary electrophoresis system (Agilent Technologies), an Agilent G3250AA LC/MSD TOF system (Agilent Technologies), an Agilent1100 series binary HPLC pump, and the G1603A Agilent CE-MS adapter and G1607A Agilent CE-ESI-MS sprayer kit. For system control and data acquisition, we used the G2201AA Agilent ChemStation software for CE and the Analyst QS for Agilent TOFMS software. CE-MS/MS analyses for compound identification were

performed on a Q-Star XL Hybrid LC-MS/MS System (Applied Biosystems) connected to an Agilent CE instrument.

**CE-TOFMS Conditions for Cationic Metabolite Analysis.** Separations were carried out in a fused silica capillary (50- $\mu\text{m}$  inner diameter  $\times$  100-cm total length) filled with 1 M formic acid as the electrolyte (6).  $\times 48 \approx 3$  nL of the sample solution was injected at 50 mbar for 3 s and 30 kilovolts of voltage applied. The capillary temperature was maintained at 20 °C, and the sample tray was cooled below 5 °C. Methanol water (50% vol/vol) containing 0.5  $\mu\text{M}$  reserpine was delivered as the sheath liquid at 10  $\mu\text{L}/\text{min}$ . ESI-TOFMS was operated in the positive ion mode, and the capillary voltage was set at 4 kilovolts. A flow rate of heated dry nitrogen gas (heater temperature 300 °C) was maintained at 10 psig. In TOFMS, the fragmentor, skimmer and Oct RFV voltages were set at 120, 50, and 200 volts, respectively. Automatic recalibration of each acquired spectrum was performed using reference masses of reference standards. The methanol adduct ion ( $[\text{2MeOH} + \text{H}_2\text{O} + \text{H}]^+$ ,  $m/z$  65.0597) and reserpine ( $[\text{M}^+\text{H}]^+$ ,  $m/z$  609.2806) provided the lock mass for exact mass measurements. Exact mass data were acquired at a rate of 10 spectra/s over a 50–1,000  $m/z$  range.

**Associating Peaks of LC-MS Data.** The LC-MS dataset comprises 3 series of samples. The first series included the following sample sets for making a metabolite timetable: pooled CBA/N young male plasma collected under LD ( $n = 5$  per time point), DD ( $n = 4$ –6 per time point) and pooled *Cry1*<sup>-/-</sup>, *Cry2*<sup>-/-</sup> plasma ( $n = 2$  per time point). The second series included the following sample sets for BT measurement: individual CBA/N plasma collected under LD and DD; individual C57BL/6 plasma collected under LD and DD; and aged male and young female CBA/N mice under LD and young male CBA/N undergoing jet lag. The third series included CBA/N plasma collected during food deprivation. Samples in a single series were measured within 2 days: 1 day for positive ions and the other for negative ions. There are longer intervals between the measuring dates of 3 series ( $\approx 3$  months between the first and the second series and  $\approx 1$  year between the first and the third series).

For the intraseries peak association, we used Marker View software (Applied Biosystems). We set the detection range of the migration time from 3 to 28 min. For the interseries peak association, we first corrected retention time (RT) according to the reported method (7), then we associated the peaks in 2 series with the smallest values of:

$(\text{difference of } m/z \text{ between 2 series}/X)^2 + (\text{difference of RT between 2 series}/Y)^2$  in peaks with  $(\text{difference of } m/z) < X$  and  $(\text{difference of RT}) < Y$  in both series. Parameters  $X$  and  $Y$  were determined by the following procedure: (i) the values of  $X$  and  $Y$  were changed (e.g.,  $X = 0.01, 0.02, \dots, 0.15$  and  $Y = 0.1, 0.2, \dots, 1.5$ ) and peaks were associated. (ii) Pearson's correlations of the associated peak area were calculated, and  $P$  values were estimated. (iii) We then chose the parameter sets with the smallest

$P$  values. In this procedure, the best parameter sets were  $X = 0.09, Y = 0.5$  (positive ions), and  $X = 0.13, Y = 0.4$  (negative ions) for the first and the second series and  $X = 0.11, Y = 0.9$  (positive ions) and  $X = 0.15, Y = 1.3$  (negative ions) for the first and the third series.

**Associating Peaks of CE-MS Data.** We associated peaks of CE-MS data with the KEIO MasterHANDs software (8), in which automated algorithm and manual curation are used.

**Normalization of Peak Areas.** For the LC-MS data, 1 (centroid) sample was chosen from 24 LD/DD pooled samples (this centroid sample had the largest mean of Pearson's correlation with the other 23 samples). Centroid samples were independently chosen for positive and negative ion data. Then, for each sample, linear regression to the function  $Y = X + a$  was performed on the areas of the target ( $X$ ) and centroid sample ( $Y$ ), and normalized areas of the target samples according to the fitted linear function by subtracting the fitted value  $a$  from the target areas. For the CE-MS data, each area was normalized by dividing it by the area of the internal control (methionine sulfone) spiked into each sample.

**Making the Metabolite Timetable.** First, we chose substances that were detected at 10 or more time points in both LD and DD conditions. Next, for each chosen metabolite, area values in LD and DD were scaled to have the same mean values in LD and DD. For the scaled areas, we searched for the maximum Pearson's correlation of a cosine curve over a 24-h period and its phase with a Fourier transformation-based method (9). We then estimated  $P$  values and FDRs by permutation tests. Substances that have  $\text{FDR} < 0.01$  for LC-MS data and both  $\text{FDR} < 0.01$  and  $\text{FDR} < 0.1$  for CE-MS data were selected as significantly oscillating metabolites. We focused on cosine-wave-like metabolites, because the estimation of peak time of circadian metabolites of cosine-wave form is not affected by the time points in the construction of metabolite timetable.

**Metabolic Map.** Identified circadian oscillatory metabolites were put on the known metabolic map, and the metabolic map was generated through the use of Ingenuity Pathways Analysis (ver. 7.0, Ingenuity Systems).

**Estimating a Lower Bound of Peak Counts in a Reliable Timetable.** To estimate a lower limitation of the number of peaks in a timetable, we performed BT estimation algorithm with shrunk timetables. For choosing  $n$  peaks in a timetable, all positive and negative ion peaks were sorted by  $P$  value (FDR) of their circadian oscillation and by correlations to cosine curves within the same  $P$  values, and the best  $n$  peaks were retrieved. By changing the number of peaks ( $n$ ) within a range between 3 and 200, BTs of LD and DD individual samples were estimated with the shrunk timetables, and mean estimation errors and  $P$  values were calculated.

1. Ueda HR, et al. (2005) System-level identification of transcriptional circuits underlying mammalian circadian clocks. *Nat Genet* 37:187–192.
2. Kumaki Y, et al. (2008) Analysis and synthesis of high-amplitude cis-elements in the mammalian circadian clock. *Proc Natl Acad Sci USA* 105:14946–14951.
3. Ueda HR, et al. (2002) A transcription factor response element for gene expression during circadian night. *Nature* 418:534–539.
4. Reddy AB, et al. (2006) Circadian orchestration of the hepatic proteome. *Curr Biol* 16:1107–1115.
5. Taguchi R, et al. (2005) Focused lipidomics by tandem mass spectrometry. *J Chromatogr B Analyt Technol Biomed Life Sci* 823:26–36.

6. Soga T, Heiger DN (2000) Amino acid analysis by capillary electrophoresis electrospray ionization mass spectrometry. *Anal Chem* 72:1236–1241.
7. Soga T, et al. (2006) Differential metabolomics reveals ophthalmic acid as an oxidative stress biomarker indicating hepatic glutathione consumption. *J Biol Chem* 281:16768–16776.
8. Baran R, et al. (2006) Mathdamp: A package for differential analysis of metabolite profiles. *BMC Bioinformatics* 7:530.
9. Chatfield C (1996) *The Analysis of Time Series: An Introduction* (Chapman and Hall/CRC, London).

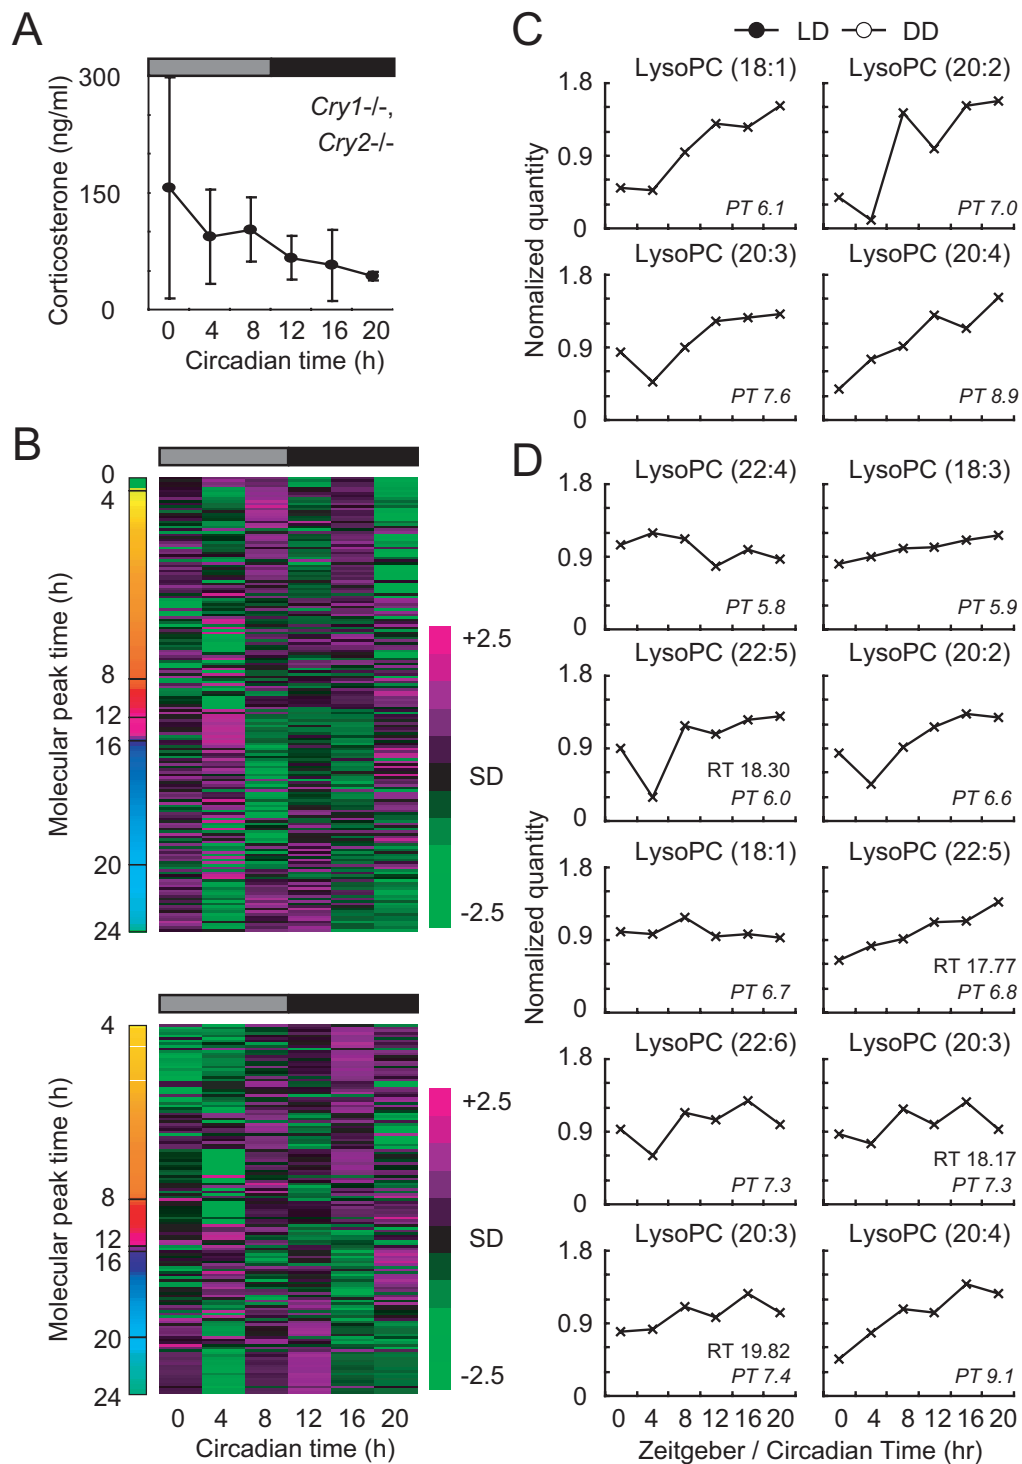

**Fig. S1.** Circadian patterns of metabolites in *Cry1<sup>-/-</sup>, Cry2<sup>-/-</sup>* mice plasma. (A) Nonrhythmic pattern of corticosterone in *Cry1<sup>-/-</sup>, Cry2<sup>-/-</sup>* ( $n = 2$ ) mice under DD conditions. (B) Time indicating metabolites lose their rhythmicity in *Cry1<sup>-/-</sup>, Cry2<sup>-/-</sup>* mice plasma. Negative ion (Upper) and positive ion (Lower) are presented as heat maps where magenta tiles indicate a high quantity of substances and green tiles indicate a low quantity in plasma. Color bars beside the heat maps indicate molecular peak time of each metabolite (Fig. 1). (C and D) Identified oscillatory peaks of *Cry1<sup>-/-</sup>, Cry2<sup>-/-</sup>* mice measured by negative ion mode (C) and positive ion mode (D). Mean value was set to 1.0.

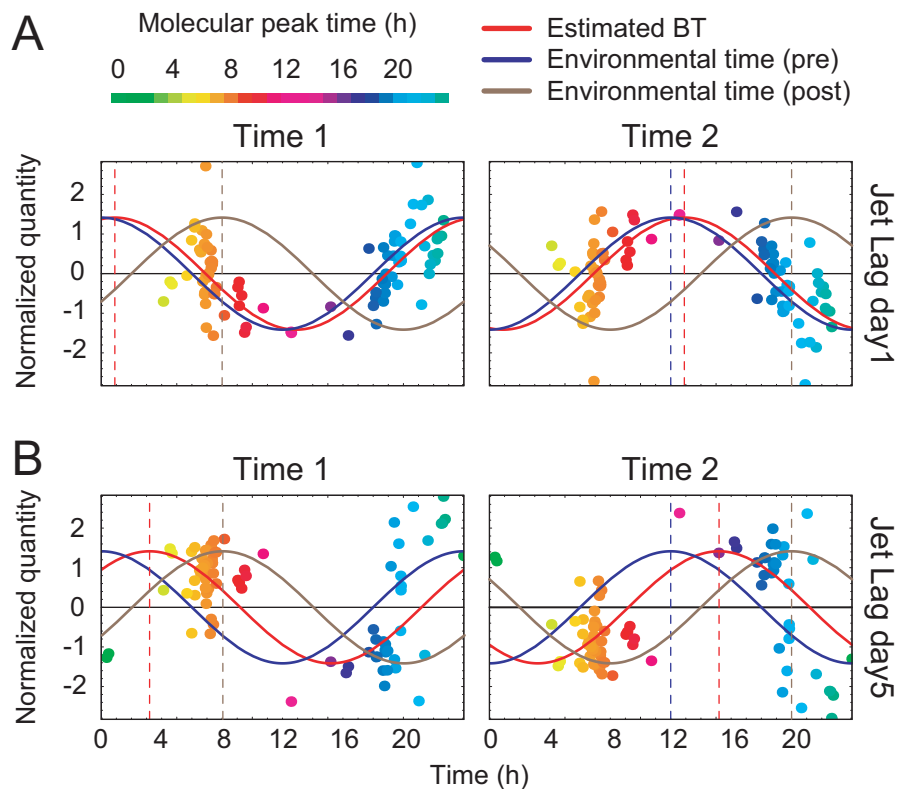

**Fig. 52.** Results of BT estimations. (*A* and *B*) BT measurement from mouse plasma collected before (day 1, *A*) and during entrainment to the new LD cycle (day 5, *B*). Colors of the dots indicate the molecular peak time of each substance (Table S1). The red cosine curve is the estimation, the blue curve is the environmental time (pre-LD condition shift), and the brown cosine curve is the environmental time (postshift). See also Table S2 for statistics.

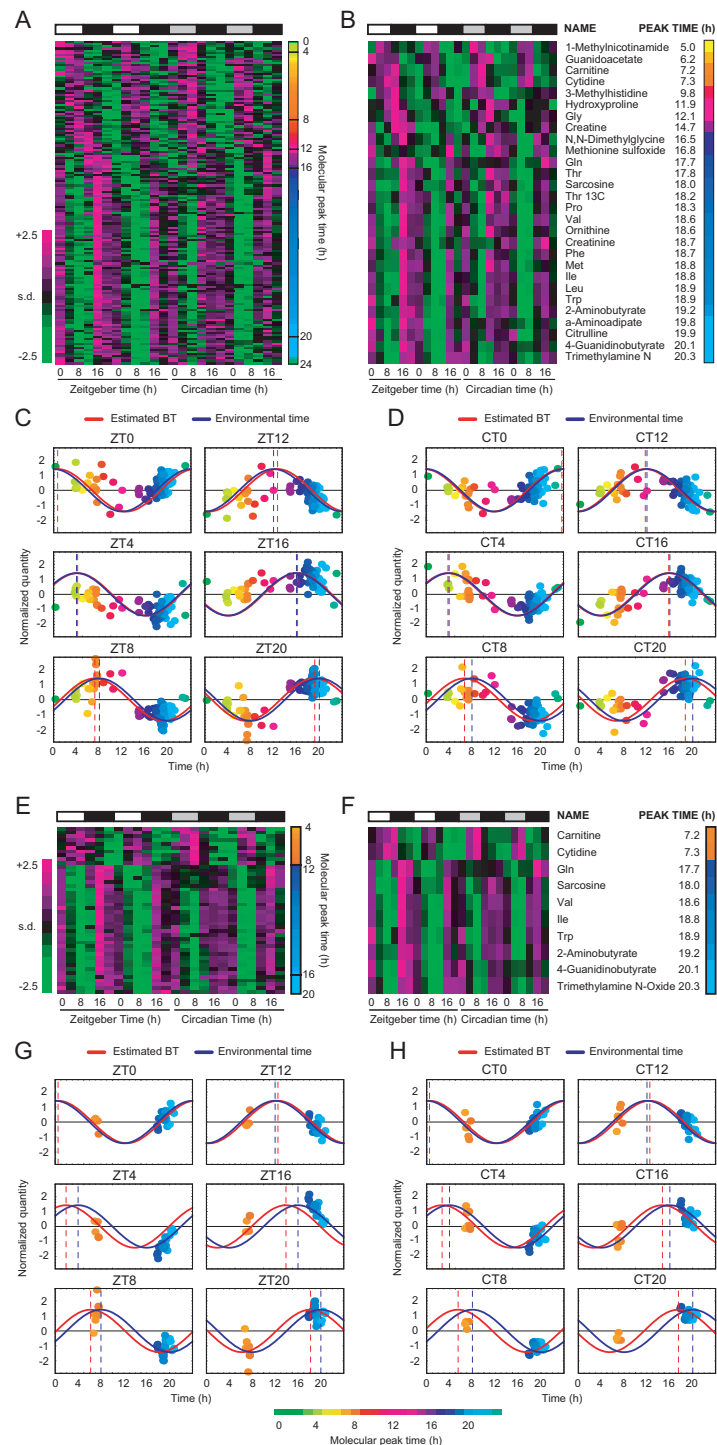

**Fig. S3.** The metabolite-timetable method based on CE-MS analysis. (A and B) Circadian oscillatory metabolites in mouse plasma (positive ion, FDR < 0.1) (A) and identified oscillatory substances (B). (C and D) BT measurements of mice kept under LD (C) and DD (D) conditions. (E and F) Circadian oscillatory metabolites in mouse plasma (positive ion, FDR < 0.01) (E) and identified oscillatory substances (F). On the heat maps, magenta tiles indicate a high quantity of metabolites and green tiles indicate a low quantity. The colored vertical bars show the molecular time of day of the metabolites. (G and H) BT measurements of mice kept under LD (G) and DD (H) conditions. Colors of the dots indicate the peak time of each molecular substance (Table S3). Peak time of the red cosine curves indicates estimated BT, and peak times of the blue indicate the environmental time. The dashed vertical lines show the BT (red) or environmental time (ZT/CT, blue). See Table S4 for statistics.

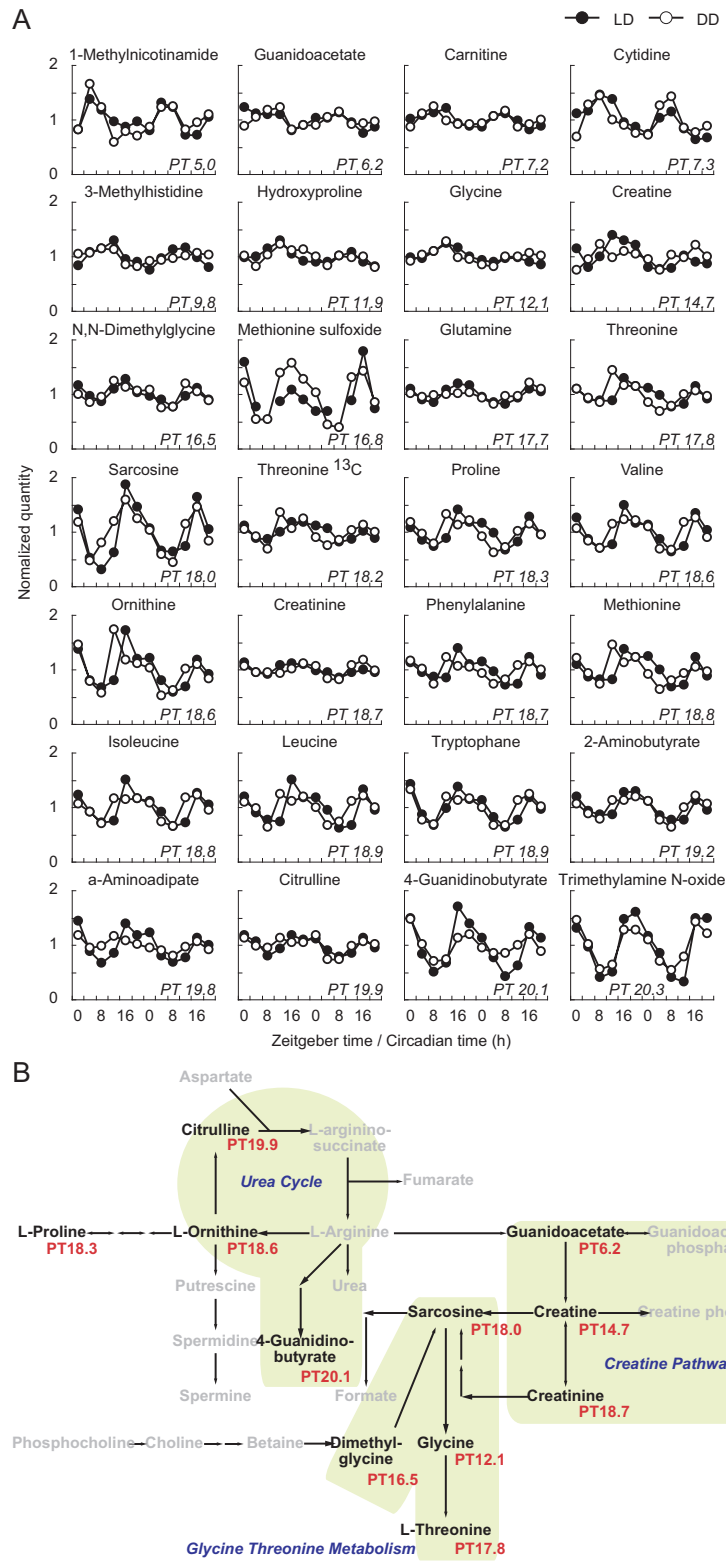

**Fig. S4.** Circadian rhythm of identified compounds (CE-MS). (A) Quantity of the substances was normalized by setting mean value as 1.0. See also Fig. S3 and Table S3. (B) Metabolic map. Identified circadian oscillatory metabolites are put on the known metabolic map using Ingenuity Pathway Analysis software (ver.7.0). Oscillation peak time (PT) is written in red.

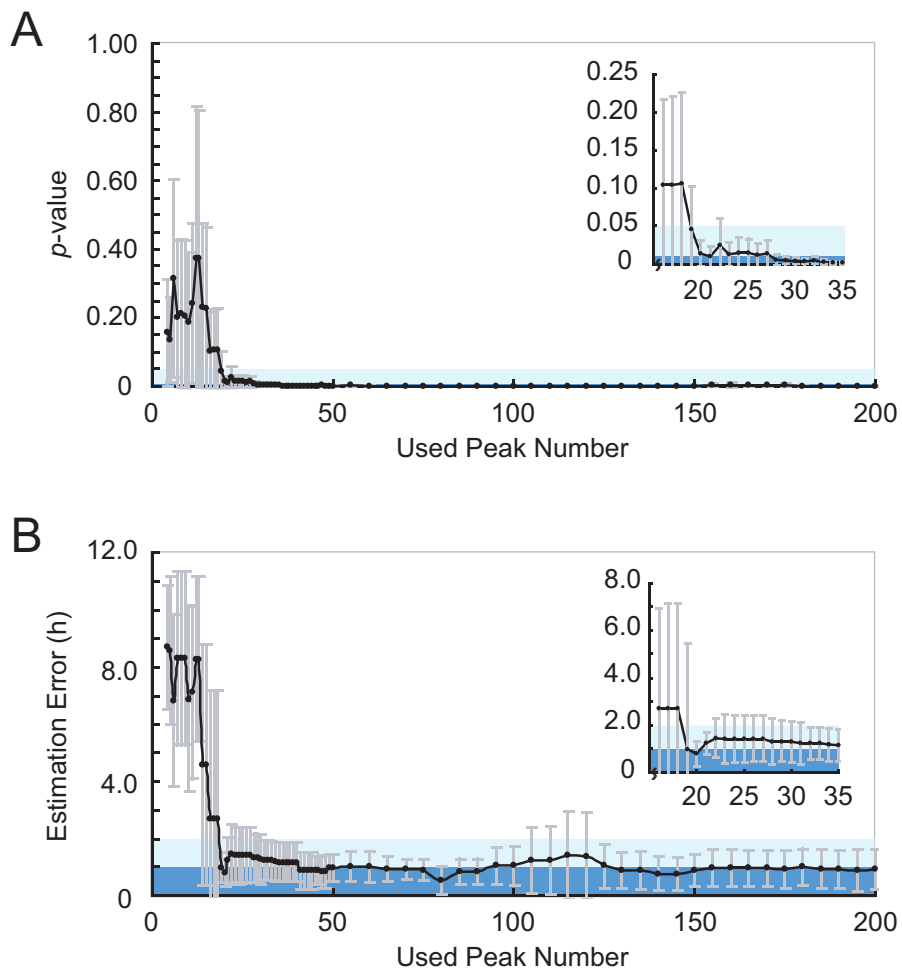

**Fig. S5.** Effect of the time-indicating metabolites number on the BT estimation. (A) Significance of the BT estimation ( $P$  value) changes according to the peak number used for the estimation (4–200). Magnified graph is shown as an *Inset* where used peak number change from 16–36. Light blue area indicates  $P < 0.05$ , and blue area indicates  $P < 0.01$ . (B) Estimation error (difference between environmental time and estimated BT) changes according to the peak number used for the estimation (4–200). Magnified graph is shown as an *Inset* where used peak number change from 16–36. Light blue area indicates estimation error is under 2 h and blue area indicates estimation error is less than 1 h.



**Table S1. Metabolite timetable for the oscillatory substances in CBA/N mice plasma analyzed by LC-MS**

| No. | Mode         | Name          | Molecular weight | Average <i>m/z</i> | Average retention time (min) | Average area | SD area    | Peak time, h | Correlation | <i>P</i> value | FDR   |
|-----|--------------|---------------|------------------|--------------------|------------------------------|--------------|------------|--------------|-------------|----------------|-------|
| 1   | positive ion |               |                  | 259.168            | 18.95                        | 680.536      | 113.224    | 7.5          | 0.835       | 0.001          | 0.001 |
| 2   | positive ion |               |                  | 263.225            | 15.90                        | 1267.979     | 379.237    | 19.5         | 0.896       | 0.001          | 0.001 |
| 3   | positive ion |               |                  | 277.198            | 15.12                        | 1274.406     | 320.623    | 18.7         | 0.838       | 0.001          | 0.001 |
| 4   | positive ion |               |                  | 277.204            | 14.28                        | 296.115      | 119.044    | 18.4         | 0.906       | 0.001          | 0.001 |
| 5   | positive ion |               |                  | 279.223            | 16.13                        | 1554.517     | 419.493    | 18.1         | 0.875       | 0.001          | 0.001 |
| 6   | positive ion |               |                  | 279.235            | 15.23                        | 12662.494    | 4059.509   | 18.6         | 0.939       | 0.001          | 0.001 |
| 7   | positive ion |               |                  | 280.231            | 15.27                        | 930.932      | 427.375    | 18.8         | 0.931       | 0.001          | 0.001 |
| 8   | positive ion |               |                  | 281.242            | 15.85                        | 1846.537     | 642.628    | 19.4         | 0.882       | 0.001          | 0.001 |
| 9   | positive ion |               |                  | 287.217            | 18.95                        | 1786.261     | 169.945    | 9.4          | 0.870       | 0.001          | 0.001 |
| 10  | positive ion |               |                  | 293.230            | 18.98                        | 907.507      | 191.657    | 6.8          | 0.870       | 0.001          | 0.001 |
| 11  | positive ion |               |                  | 311.237            | 18.95                        | 2633.633     | 653.209    | 7.0          | 0.897       | 0.001          | 0.001 |
| 12  | positive ion |               |                  | 312.236            | 18.95                        | 501.591      | 130.407    | 7.0          | 0.885       | 0.001          | 0.001 |
| 13  | positive ion |               |                  | 313.263            | 18.33                        | 56316.017    | 22297.471  | 19.8         | 0.894       | 0.001          | 0.001 |
| 14  | positive ion |               |                  | 314.278            | 18.38                        | 8279.417     | 2963.854   | 19.8         | 0.894       | 0.001          | 0.001 |
| 15  | positive ion |               |                  | 329.237            | 18.97                        | 29876.683    | 12167.922  | 6.9          | 0.901       | 0.001          | 0.001 |
| 16  | positive ion |               |                  | 330.244            | 18.97                        | 5199.338     | 1879.800   | 7.0          | 0.902       | 0.001          | 0.001 |
| 17  | positive ion |               |                  | 341.303            | 20.00                        | 4548.040     | 746.126    | 19.2         | 0.843       | 0.001          | 0.001 |
| 18  | positive ion |               |                  | 347.275            | 18.97                        | 3700.810     | 1235.852   | 7.1          | 0.855       | 0.001          | 0.001 |
| 19  | positive ion |               |                  | 348.218            | 6.97                         | 160.043      | 145.686    | 11.1         | 0.844       | 0.001          | 0.001 |
| 20  | positive ion |               |                  | 351.223            | 18.94                        | 872.783      | 220.402    | 7.2          | 0.877       | 0.001          | 0.001 |
| 21  | positive ion |               |                  | 353.248            | 18.67                        | 293.040      | 97.967     | 19.6         | 0.899       | 0.001          | 0.001 |
| 22  | positive ion |               |                  | 359.323            | 20.00                        | 1109.792     | 287.936    | 19.3         | 0.867       | 0.001          | 0.001 |
| 23  | positive ion |               |                  | 383.163            | 18.88                        | 199.894      | 62.905     | 6.8          | 0.892       | 0.001          | 0.001 |
| 24  | positive ion |               |                  | 383.332            | 20.18                        | 437.545      | 86.679     | 15.3         | 0.867       | 0.001          | 0.001 |
| 25  | positive ion |               |                  | 385.161            | 18.97                        | 373.294      | 101.937    | 7.2          | 0.874       | 0.001          | 0.001 |
| 26  | positive ion |               |                  | 387.348            | 20.27                        | 774.230      | 337.489    | 19.2         | 0.876       | 0.001          | 0.001 |
| 27  | positive ion |               |                  | 409.383            | 22.48                        | 912.330      | 240.331    | 20.0         | 0.909       | 0.001          | 0.001 |
| 28  | positive ion |               |                  | 431.319            | 15.82                        | 473.819      | 220.486    | 15.2         | 0.923       | 0.001          | 0.001 |
| 29  | positive ion |               |                  | 541.605            | 17.15                        | 3336.822     | 763.362    | 9.1          | 0.863       | 0.001          | 0.001 |
| 30  | positive ion |               |                  | 542.625            | 17.22                        | 493.830      | 113.959    | 8.9          | 0.869       | 0.001          | 0.001 |
| 31  | positive ion |               |                  | 543.612            | 18.17                        | 1293.885     | 401.579    | 7.4          | 0.891       | 0.001          | 0.001 |
| 32  | positive ion |               |                  | 544.328            | 19.00                        | 5254.587     | 1031.599   | 7.6          | 0.871       | 0.001          | 0.001 |
| 33  | positive ion | LysoPC (20:4) | 543.3            | 544.337            | 17.23                        | 564540.794   | 117542.644 | 9.1          | 0.870       | 0.001          | 0.001 |
| 34  | positive ion |               |                  | 544.591            | 17.27                        | 4990.002     | 948.585    | 9.0          | 0.862       | 0.001          | 0.001 |
| 35  | positive ion |               |                  | 545.343            | 18.98                        | 963.360      | 184.758    | 7.5          | 0.825       | 0.001          | 0.001 |
| 36  | positive ion | LysoPC (20:3) | 545.3            | 546.341            | 18.17                        | 332357.807   | 101269.750 | 7.3          | 0.897       | 0.001          | 0.001 |
| 37  | positive ion |               |                  | 546.349            | 17.22                        | 15852.819    | 3089.025   | 9.3          | 0.886       | 0.001          | 0.001 |
| 38  | positive ion |               |                  | 546.621            | 18.12                        | 1788.982     | 500.325    | 7.2          | 0.902       | 0.001          | 0.001 |
| 39  | positive ion |               |                  | 547.357            | 18.17                        | 66588.046    | 20877.069  | 7.3          | 0.883       | 0.001          | 0.001 |
| 40  | positive ion |               |                  | 548.348            | 18.20                        | 11832.511    | 2896.932   | 7.4          | 0.900       | 0.001          | 0.001 |
| 41  | positive ion | LysoPC (20:2) | 547.4            | 548.365            | 19.28                        | 31418.392    | 9477.594   | 6.6          | 0.840       | 0.001          | 0.001 |
| 42  | positive ion |               |                  | 549.357            | 18.12                        | 494.375      | 139.940    | 6.9          | 0.875       | 0.001          | 0.001 |
| 43  | positive ion |               |                  | 565.491            | 17.25                        | 3980.272     | 929.495    | 7.3          | 0.911       | 0.001          | 0.001 |
| 44  | positive ion |               |                  | 565.571            | 17.33                        | 1377.696     | 305.096    | 7.3          | 0.899       | 0.001          | 0.001 |
| 45  | positive ion | LysoPC (22:6) | 567.3            | 568.337            | 17.32                        | 664127.323   | 156822.529 | 7.3          | 0.912       | 0.001          | 0.001 |
| 46  | positive ion |               |                  | 568.622            | 17.30                        | 4832.434     | 1126.418   | 7.3          | 0.909       | 0.001          | 0.001 |
| 47  | positive ion |               |                  | 568.703            | 17.33                        | 860.281      | 231.124    | 7.2          | 0.871       | 0.001          | 0.001 |
| 48  | positive ion |               |                  | 569.346            | 17.30                        | 154201.890   | 47981.279  | 7.3          | 0.886       | 0.001          | 0.001 |
| 49  | positive ion |               |                  | 571.333            | 17.27                        | 1201.830     | 291.043    | 7.4          | 0.874       | 0.001          | 0.001 |
| 50  | positive ion |               |                  | 571.369            | 17.78                        | 10150.764    | 2608.503   | 6.6          | 0.831       | 0.001          | 0.001 |
| 51  | positive ion |               |                  | 279.216            | 14.42                        | 731.443      | 173.653    | 18.6         | 0.841       | 0.001          | 0.001 |
| 52  | positive ion |               |                  | 307.257            | 19.53                        | 1538.606     | 262.321    | 7.4          | 0.827       | 0.001          | 0.001 |
| 53  | positive ion |               |                  | 331.259            | 19.40                        | 4657.461     | 995.189    | 6.3          | 0.838       | 0.001          | 0.001 |
| 54  | positive ion |               |                  | 331.279            | 18.68                        | 10034.038    | 3719.162   | 19.8         | 0.902       | 0.001          | 0.001 |
| 55  | positive ion |               |                  | 332.276            | 18.67                        | 1950.226     | 684.491    | 19.4         | 0.864       | 0.001          | 0.001 |
| 56  | positive ion |               |                  | 347.219            | 6.97                         | 1074.169     | 912.100    | 11.1         | 0.853       | 0.001          | 0.001 |
| 57  | positive ion | LysoPC (18:1) | 521.3            | 522.335            | 18.40                        | 1438967.258  | 148636.948 | 6.7          | 0.853       | 0.001          | 0.001 |
| 58  | positive ion |               |                  | 541.692            | 17.25                        | 661.837      | 171.433    | 8.9          | 0.837       | 0.001          | 0.001 |
| 59  | positive ion |               |                  | 545.334            | 17.20                        | 122253.699   | 33901.935  | 9.3          | 0.863       | 0.001          | 0.001 |
| 60  | positive ion |               |                  | 545.588            | 17.18                        | 835.571      | 168.267    | 8.4          | 0.833       | 0.001          | 0.001 |
| 61  | positive ion |               |                  | 636.570            | 25.33                        | 169.170      | 136.470    | 20.8         | 0.863       | 0.001          | 0.001 |
| 62  | positive ion |               |                  | 279.223            | 13.45                        | 1160.550     | 350.077    | 18.5         | 0.824       | 0.001          | 0.001 |

| No. | Mode         | Name          | Molecular weight | Average <i>m/z</i> | Average retention time (min) | Average area | SD area   | Peak time, h | Correlation | <i>P</i> value | FDR   |
|-----|--------------|---------------|------------------|--------------------|------------------------------|--------------|-----------|--------------|-------------|----------------|-------|
| 63  | positive ion |               |                  | 346.270            | 18.97                        | 18974.418    | 7461.593  | 7.1          | 0.840       | 0.001          | 0.001 |
| 64  | positive ion | LysoPC (18:3) | 517.3            | 518.327            | 19.00                        | 1324.008     | 171.641   | 5.9          | 0.814       | 0.001          | 0.001 |
| 65  | positive ion |               |                  | 549.375            | 19.28                        | 5059.172     | 1504.341  | 6.5          | 0.828       | 0.001          | 0.001 |
| 66  | positive ion | LysoPC (22:5) | 569.3            | 570.348            | 17.77                        | 51799.410    | 14327.626 | 6.8          | 0.836       | 0.001          | 0.001 |
| 67  | positive ion |               |                  | 519.838            | 18.44                        | 778.986      | 117.274   | 6.1          | 0.781       | 0.001          | 0.001 |
| 68  | positive ion |               |                  | 342.300            | 19.95                        | 855.019      | 152.425   | 19.3         | 0.796       | 0.001          | 0.001 |
| 69  | positive ion |               |                  | 346.333            | 20.80                        | 313.262      | 175.233   | 16.1         | 0.800       | 0.001          | 0.001 |
| 70  | positive ion |               |                  | 318.303            | 19.60                        | 371.646      | 212.735   | 16.3         | 0.809       | 0.001          | 0.001 |
| 71  | positive ion |               |                  | 345.329            | 20.79                        | 1571.960     | 841.011   | 16.3         | 0.796       | 0.001          | 0.001 |
| 72  | positive ion |               |                  | 399.310            | 18.12                        | 255.979      | 84.625    | 8.1          | 0.778       | 0.001          | 0.001 |
| 73  | positive ion |               |                  | 512.331            | 12.72                        | 257.272      | 64.113    | 6.2          | 0.793       | 0.001          | 0.001 |
| 74  | positive ion |               |                  | 370.293            | 16.72                        | 1500.262     | 199.518   | 7.5          | 0.781       | 0.001          | 0.001 |
| 75  | positive ion |               |                  | 573.358            | 19.00                        | 331.059      | 93.355    | 5.8          | 0.780       | 0.001          | 0.001 |
| 76  | positive ion |               |                  | 550.385            | 19.50                        | 3329.852     | 674.277   | 7.0          | 0.776       | 0.001          | 0.001 |
| 77  | positive ion |               |                  | 566.311            | 16.73                        | 1080.929     | 301.946   | 6.7          | 0.763       | 0.001          | 0.001 |
| 78  | positive ion | LysoPC (22:4) | 571.4            | 572.363            | 19.03                        | 2313.460     | 607.212   | 5.8          | 0.765       | 0.001          | 0.001 |
| 79  | positive ion |               |                  | 374.298            | 19.88                        | 713.472      | 181.403   | 5.2          | 0.772       | 0.001          | 0.002 |
| 80  | positive ion |               |                  | 525.371            | 18.40                        | 2846.923     | 430.773   | 6.3          | 0.757       | 0.001          | 0.002 |
| 81  | positive ion |               |                  | 524.358            | 18.40                        | 43729.790    | 7838.563  | 6.4          | 0.754       | 0.001          | 0.002 |
| 82  | positive ion |               |                  | 572.372            | 18.30                        | 380.865      | 106.527   | 5.9          | 0.779       | 0.001          | 0.002 |
| 83  | positive ion |               |                  | 317.301            | 19.60                        | 2317.049     | 1147.910  | 16.2         | 0.779       | 0.001          | 0.002 |
| 84  | positive ion |               |                  | 523.346            | 18.42                        | 404594.680   | 75774.231 | 6.0          | 0.761       | 0.001          | 0.002 |
| 85  | positive ion |               |                  | 548.313            | 17.28                        | 1268.283     | 149.821   | 21.4         | 0.749       | 0.001          | 0.002 |
| 86  | positive ion |               |                  | 523.621            | 18.42                        | 2580.838     | 459.821   | 6.2          | 0.764       | 0.001          | 0.002 |
| 87  | positive ion |               |                  | 521.728            | 18.40                        | 610.377      | 140.297   | 5.8          | 0.741       | 0.001          | 0.002 |
| 88  | positive ion |               |                  | 596.390            | 18.83                        | 91.306       | 29.262    | 6.1          | 0.744       | 0.001          | 0.002 |
| 89  | positive ion |               |                  | 362.355            | 20.78                        | 43.167       | 37.661    | 16.5         | 0.775       | 0.001          | 0.002 |
| 90  | positive ion |               |                  | 326.300            | 18.43                        | 690.967      | 136.709   | 6.9          | 0.762       | 0.001          | 0.002 |
| 91  | positive ion |               |                  | 520.821            | 18.42                        | 872.018      | 181.300   | 5.8          | 0.742       | 0.001          | 0.002 |
| 92  | positive ion |               |                  | 315.262            | 18.37                        | 2923.306     | 306.647   | 18.8         | 0.743       | 0.001          | 0.002 |
| 93  | positive ion |               |                  | 522.601            | 18.43                        | 12091.786    | 2449.671  | 6.1          | 0.745       | 0.001          | 0.002 |
| 94  | positive ion |               |                  | 373.320            | 19.73                        | 98.495       | 62.405    | 19.0         | 0.742       | 0.001          | 0.002 |
| 95  | positive ion |               |                  | 329.271            | 17.57                        | 5496.755     | 1519.695  | 20.4         | 0.734       | 0.001          | 0.003 |
| 96  | positive ion |               |                  | 504.340            | 18.42                        | 3842.014     | 808.028   | 5.9          | 0.750       | 0.001          | 0.003 |
| 97  | positive ion |               |                  | 436.367            | 17.08                        | 485.329      | 157.744   | 10.7         | 0.749       | 0.001          | 0.003 |
| 98  | positive ion |               |                  | 521.497            | 17.40                        | 41.582       | 7.371     | 9.7          | 0.730       | 0.001          | 0.003 |
| 99  | positive ion |               |                  | 519.727            | 18.43                        | 9878.390     | 1981.348  | 6.1          | 0.736       | 0.001          | 0.003 |
| 100 | positive ion | LysoPC (22:5) | 569.3            | 570.366            | 18.30                        | 4114.696     | 1380.699  | 6.0          | 0.743       | 0.001          | 0.003 |
| 101 | positive ion |               |                  | 330.264            | 17.53                        | 529.255      | 192.289   | 21.0         | 0.715       | 0.001          | 0.003 |
| 102 | positive ion |               |                  | 522.841            | 18.35                        | 1113.863     | 165.509   | 6.2          | 0.739       | 0.001          | 0.003 |
| 103 | positive ion |               |                  | 375.335            | 19.08                        | 2394.065     | 485.565   | 21.9         | 0.732       | 0.001          | 0.004 |
| 104 | positive ion |               |                  | 306.240            | 18.98                        | 1392.327     | 161.405   | 10.8         | 0.720       | 0.001          | 0.004 |
| 105 | positive ion |               |                  | 332.344            | 20.70                        | 46.496       | 37.272    | 16.5         | 0.715       | 0.001          | 0.004 |
| 106 | positive ion |               |                  | 386.346            | 21.28                        | 586.777      | 169.221   | 19.5         | 0.727       | 0.001          | 0.004 |
| 107 | positive ion |               |                  | 520.718            | 18.47                        | 3383.655     | 667.715   | 5.9          | 0.720       | 0.001          | 0.004 |
| 108 | positive ion |               |                  | 345.204            | 12.45                        | 78.870       | 46.583    | 18.3         | 0.732       | 0.001          | 0.005 |
| 109 | positive ion |               |                  | 348.288            | 19.38                        | 2629.987     | 618.067   | 6.3          | 0.698       | 0.001          | 0.005 |
| 110 | positive ion |               |                  | 388.344            | 20.48                        | 747.417      | 89.691    | 17.7         | 0.734       | 0.001          | 0.005 |
| 111 | positive ion |               |                  | 380.272            | 18.98                        | 1664.930     | 358.957   | 22.1         | 0.716       | 0.001          | 0.005 |
| 112 | positive ion |               |                  | 523.132            | 18.45                        | 136.258      | 21.291    | 5.8          | 0.713       | 0.001          | 0.005 |
| 113 | positive ion |               |                  | 567.337            | 16.67                        | 108.495      | 39.102    | 5.8          | 0.706       | 0.001          | 0.005 |
| 114 | positive ion |               |                  | 549.296            | 17.22                        | 150.371      | 27.316    | 22.6         | 0.704       | 0.001          | 0.005 |
| 115 | positive ion |               |                  | 305.238            | 18.98                        | 7870.504     | 959.429   | 10.7         | 0.693       | 0.001          | 0.005 |
| 116 | positive ion |               |                  | 312.256            | 17.20                        | 1031.381     | 252.830   | 20.6         | 0.685       | 0.001          | 0.005 |
| 117 | positive ion |               |                  | 369.342            | 20.25                        | 1971.864     | 301.209   | 17.3         | 0.714       | 0.001          | 0.005 |
| 118 | positive ion |               |                  | 337.596            | 18.75                        | 1763.148     | 346.256   | 22.6         | 0.700       | 0.001          | 0.006 |
| 119 | positive ion |               |                  | 523.355            | 17.90                        | 26718.383    | 3737.029  | 6.4          | 0.692       | 0.001          | 0.006 |
| 120 | positive ion | LysoPC (20:3) | 545.3            | 546.349            | 19.82                        | 3780.333     | 402.569   | 7.4          | 0.705       | 0.001          | 0.006 |
| 121 | positive ion |               |                  | 358.294            | 18.73                        | 42123.449    | 9163.205  | 22.2         | 0.706       | 0.001          | 0.006 |
| 122 | positive ion |               |                  | 505.342            | 18.39                        | 707.255      | 184.249   | 5.9          | 0.699       | 0.001          | 0.006 |
| 123 | positive ion |               |                  | 289.214            | 9.25                         | 882.358      | 418.390   | 7.9          | 0.689       | 0.002          | 0.007 |
| 124 | positive ion |               |                  | 374.327            | 19.07                        | 11115.887    | 2772.848  | 21.8         | 0.708       | 0.002          | 0.007 |
| 125 | positive ion |               |                  | 406.288            | 18.38                        | 765.302      | 250.759   | 19.7         | 0.696       | 0.002          | 0.007 |

| No. | Mode         | Name | Molecular weight | Average <i>m/z</i> | Average retention time (min) | Average area | SD area   | Peak time, h | Correlation | <i>P</i> value | FDR   |
|-----|--------------|------|------------------|--------------------|------------------------------|--------------|-----------|--------------|-------------|----------------|-------|
| 126 | positive ion |      |                  | 379.279            | 18.98                        | 8480.791     | 1943.681  | 21.9         | 0.697       | 0.002          | 0.007 |
| 127 | positive ion |      |                  | 357.281            | 18.73                        | 259998.715   | 44246.206 | 22.3         | 0.694       | 0.002          | 0.007 |
| 128 | positive ion |      |                  | 311.720            | 18.37                        | 82.902       | 43.108    | 19.9         | 0.696       | 0.002          | 0.007 |
| 129 | positive ion |      |                  | 265.247            | 18.75                        | 167133.709   | 32570.621 | 22.7         | 0.684       | 0.002          | 0.008 |
| 130 | positive ion |      |                  | 340.286            | 18.72                        | 41660.235    | 9385.544  | 22.5         | 0.684       | 0.002          | 0.008 |
| 131 | positive ion |      |                  | 327.614            | 18.95                        | 87.191       | 45.874    | 7.2          | 0.662       | 0.002          | 0.008 |
| 132 | positive ion |      |                  | 359.302            | 18.73                        | 4316.612     | 718.731   | 22.3         | 0.691       | 0.002          | 0.008 |
| 133 | positive ion |      |                  | 355.505            | 18.80                        | 1833.678     | 334.469   | 22.2         | 0.696       | 0.002          | 0.008 |
| 134 | positive ion |      |                  | 407.308            | 19.10                        | 348.211      | 98.810    | 17.1         | 0.695       | 0.002          | 0.008 |
| 135 | positive ion |      |                  | 534.349            | 18.32                        | 500.526      | 81.959    | 5.7          | 0.691       | 0.002          | 0.008 |
| 136 | positive ion |      |                  | 356.679            | 18.79                        | 399.614      | 82.757    | 22.3         | 0.681       | 0.002          | 0.009 |
| 137 | positive ion |      |                  | 337.672            | 19.04                        | 69.349       | 19.694    | 21.9         | 0.683       | 0.002          | 0.009 |
| 138 | positive ion |      |                  | 266.249            | 18.75                        | 21598.850    | 4236.871  | 22.7         | 0.679       | 0.002          | 0.009 |
| 139 | positive ion |      |                  | 324.286            | 17.52                        | 102.696      | 26.308    | 6.5          | 0.671       | 0.002          | 0.009 |
| 140 | positive ion |      |                  | 547.357            | 17.18                        | 559.306      | 75.888    | 9.1          | 0.676       | 0.002          | 0.009 |
| 141 | positive ion |      |                  | 383.310            | 17.08                        | 1062.482     | 197.625   | 9.9          | 0.679       | 0.002          | 0.010 |
| 142 | positive ion |      |                  | 339.278            | 18.75                        | 247653.315   | 41743.139 | 22.6         | 0.677       | 0.002          | 0.010 |
| 1   | negative ion |      |                  | 260.234            | 19.07                        | 699.25       | 83.33     | 13.1         | 0.840       | 0.001          | 0.001 |
| 2   | negative ion |      |                  | 267.147            | 13.60                        | 2669.96      | 853.77    | 18.3         | 0.845       | 0.001          | 0.001 |
| 3   | negative ion |      |                  | 271.230            | 15.68                        | 2386.35      | 887.29    | 20.6         | 0.927       | 0.001          | 0.001 |
| 4   | negative ion |      |                  | 275.194            | 17.45                        | 10029.21     | 3439.39   | 21.4         | 0.912       | 0.001          | 0.001 |
| 5   | negative ion |      |                  | 276.190            | 17.45                        | 1285.10      | 380.62    | 21.4         | 0.927       | 0.001          | 0.001 |
| 6   | negative ion |      |                  | 277.206            | 15.38                        | 143.57       | 69.28     | 18.9         | 0.937       | 0.001          | 0.001 |
| 7   | negative ion |      |                  | 281.817            | 19.00                        | 502.83       | 187.97    | 7.0          | 0.906       | 0.001          | 0.001 |
| 8   | negative ion |      |                  | 283.008            | 19.05                        | 293.65       | 120.31    | 6.3          | 0.908       | 0.001          | 0.001 |
| 9   | negative ion |      |                  | 283.235            | 19.02                        | 133511.77    | 48621.92  | 6.8          | 0.917       | 0.001          | 0.001 |
| 10  | negative ion |      |                  | 284.238            | 19.00                        | 16561.78     | 7149.41   | 6.9          | 0.912       | 0.001          | 0.001 |
| 11  | negative ion |      |                  | 285.250            | 19.45                        | 3763.22      | 817.45    | 6.4          | 0.866       | 0.001          | 0.001 |
| 12  | negative ion |      |                  | 293.211            | 14.43                        | 1159.44      | 668.10    | 18.6         | 0.930       | 0.001          | 0.001 |
| 13  | negative ion |      |                  | 294.206            | 15.22                        | 165.46       | 133.80    | 19.1         | 0.830       | 0.001          | 0.001 |
| 14  | negative ion |      |                  | 295.216            | 14.62                        | 3448.61      | 1535.27   | 18.7         | 0.944       | 0.001          | 0.001 |
| 15  | negative ion |      |                  | 295.216            | 15.38                        | 36527.53     | 22337.94  | 18.8         | 0.939       | 0.001          | 0.001 |
| 16  | negative ion |      |                  | 295.229            | 16.23                        | 6106.95      | 2106.64   | 18.2         | 0.942       | 0.001          | 0.001 |
| 17  | negative ion |      |                  | 296.215            | 16.25                        | 311.73       | 130.02    | 18.4         | 0.935       | 0.001          | 0.001 |
| 18  | negative ion |      |                  | 296.222            | 15.38                        | 2900.38      | 1770.55   | 18.8         | 0.939       | 0.001          | 0.001 |
| 19  | negative ion |      |                  | 297.235            | 15.98                        | 29591.81     | 16260.51  | 19.3         | 0.939       | 0.001          | 0.001 |
| 20  | negative ion |      |                  | 297.274            | 20.55                        | 2391.15      | 899.28    | 19.6         | 0.914       | 0.001          | 0.001 |
| 21  | negative ion |      |                  | 297.313            | 16.25                        | 83.66        | 42.52     | 17.7         | 0.910       | 0.001          | 0.001 |
| 22  | negative ion |      |                  | 298.237            | 15.98                        | 3450.60      | 1746.22   | 19.4         | 0.942       | 0.001          | 0.001 |
| 23  | negative ion |      |                  | 298.276            | 20.53                        | 295.59       | 126.15    | 19.3         | 0.915       | 0.001          | 0.001 |
| 24  | negative ion |      |                  | 299.203            | 17.28                        | 3694.94      | 704.30    | 18.9         | 0.827       | 0.001          | 0.001 |
| 25  | negative ion |      |                  | 306.245            | 19.60                        | 31485.10     | 7388.69   | 6.9          | 0.844       | 0.001          | 0.001 |
| 26  | negative ion |      |                  | 307.249            | 19.58                        | 1999.29      | 350.71    | 7.4          | 0.856       | 0.001          | 0.001 |
| 27  | negative ion |      |                  | 307.314            | 19.62                        | 100.40       | 24.36     | 7.9          | 0.840       | 0.001          | 0.001 |
| 28  | negative ion |      |                  | 315.242            | 14.90                        | 936.01       | 234.14    | 18.3         | 0.891       | 0.001          | 0.001 |
| 29  | negative ion |      |                  | 325.207            | 18.35                        | 1568.84      | 409.90    | 7.1          | 0.874       | 0.001          | 0.001 |
| 30  | negative ion |      |                  | 325.572            | 19.00                        | 8503.90      | 3037.11   | 6.8          | 0.911       | 0.001          | 0.001 |
| 31  | negative ion |      |                  | 326.310            | 19.03                        | 201.64       | 76.84     | 6.4          | 0.857       | 0.001          | 0.001 |
| 32  | negative ion |      |                  | 326.574            | 19.05                        | 2122.13      | 725.19    | 6.9          | 0.911       | 0.001          | 0.001 |
| 33  | negative ion |      |                  | 326.980            | 19.05                        | 1267.07      | 229.07    | 6.9          | 0.860       | 0.001          | 0.001 |
| 34  | negative ion |      |                  | 327.408            | 19.00                        | 1027.03      | 344.24    | 6.9          | 0.900       | 0.001          | 0.001 |
| 35  | negative ion |      |                  | 327.591            | 19.47                        | 2330.40      | 535.48    | 6.2          | 0.889       | 0.001          | 0.001 |
| 36  | negative ion |      |                  | 327.597            | 19.03                        | 166.83       | 45.22     | 7.6          | 0.874       | 0.001          | 0.001 |
| 37  | negative ion |      |                  | 327.984            | 19.05                        | 578.33       | 162.43    | 6.3          | 0.898       | 0.001          | 0.001 |
| 38  | negative ion |      |                  | 328.229            | 19.02                        | 236518.78    | 59862.66  | 6.9          | 0.907       | 0.001          | 0.001 |
| 39  | negative ion |      |                  | 329.241            | 19.47                        | 289447.74    | 45967.23  | 6.2          | 0.861       | 0.001          | 0.001 |
| 40  | negative ion |      |                  | 330.241            | 19.47                        | 58655.23     | 14721.00  | 5.6          | 0.867       | 0.001          | 0.001 |
| 41  | negative ion |      |                  | 331.250            | 19.48                        | 3126.47      | 631.48    | 5.7          | 0.865       | 0.001          | 0.001 |
| 42  | negative ion |      |                  | 348.186            | 15.93                        | 361.77       | 237.27    | 18.2         | 0.848       | 0.001          | 0.001 |
| 43  | negative ion |      |                  | 355.249            | 20.02                        | 41345.65     | 12993.37  | 4.5          | 0.867       | 0.001          | 0.001 |
| 44  | negative ion |      |                  | 356.253            | 19.98                        | 6255.08      | 1800.34   | 4.7          | 0.868       | 0.001          | 0.001 |
| 45  | negative ion |      |                  | 358.364            | 20.50                        | 38.06        | 17.10     | 7.8          | 0.811       | 0.001          | 0.001 |
| 46  | negative ion |      |                  | 373.280            | 20.77                        | 306.34       | 277.82    | 19.5         | 0.844       | 0.001          | 0.001 |

| No. | Mode         | Name          | Molecular weight | Average <i>m/z</i> | Average retention time (min) | Average area | SD area   | Peak time, h | Correlation | <i>P</i> value | FDR   |
|-----|--------------|---------------|------------------|--------------------|------------------------------|--------------|-----------|--------------|-------------|----------------|-------|
| 47  | negative ion |               |                  | 390.259            | 18.45                        | 1374.93      | 594.86    | 19.8         | 0.881       | 0.001          | 0.001 |
| 48  | negative ion |               |                  | 399.306            | 20.93                        | 116.58       | 50.29     | 19.1         | 0.848       | 0.001          | 0.001 |
| 49  | negative ion |               |                  | 405.222            | 7.13                         | 451.22       | 406.10    | 11.0         | 0.868       | 0.001          | 0.001 |
| 50  | negative ion |               |                  | 417.306            | 19.78                        | 1023.18      | 323.36    | 19.4         | 0.866       | 0.001          | 0.001 |
| 51  | negative ion |               |                  | 427.155            | 19.03                        | 493.43       | 228.78    | 6.7          | 0.895       | 0.001          | 0.001 |
| 52  | negative ion |               |                  | 429.280            | 15.93                        | 234.74       | 125.35    | 15.1         | 0.911       | 0.001          | 0.001 |
| 53  | negative ion |               |                  | 434.224            | 16.82                        | 79.23        | 53.78     | 8.2          | 0.885       | 0.001          | 0.001 |
| 54  | negative ion |               |                  | 445.337            | 20.33                        | 784.41       | 425.99    | 19.3         | 0.894       | 0.001          | 0.001 |
| 55  | negative ion |               |                  | 446.334            | 20.33                        | 113.40       | 68.16     | 19.5         | 0.862       | 0.001          | 0.001 |
| 56  | negative ion |               |                  | 583.550            | 18.47                        | 186.33       | 74.60     | 21.4         | 0.827       | 0.001          | 0.001 |
| 57  | negative ion |               |                  | 602.321            | 17.33                        | 287033.84    | 83159.82  | 9.5          | 0.844       | 0.001          | 0.001 |
| 58  | negative ion |               |                  | 603.333            | 17.33                        | 49999.32     | 15101.53  | 9.6          | 0.839       | 0.001          | 0.001 |
| 59  | negative ion | LysoPC (20:3) | 545.3            | 604.346            | 18.20                        | 137734.94    | 49610.59  | 7.6          | 0.870       | 0.001          | 0.001 |
| 60  | negative ion |               |                  | 604.346            | 19.23                        | 635.11       | 159.03    | 7.9          | 0.842       | 0.001          | 0.001 |
| 61  | negative ion |               |                  | 605.350            | 18.33                        | 21222.13     | 7271.49   | 7.6          | 0.865       | 0.001          | 0.001 |
| 62  | negative ion |               |                  | 605.424            | 17.75                        | 314.83       | 95.97     | 8.0          | 0.841       | 0.001          | 0.001 |
| 63  | negative ion |               |                  | 606.347            | 18.22                        | 2143.26      | 603.14    | 7.8          | 0.876       | 0.001          | 0.001 |
| 64  | negative ion |               |                  | 612.248            | 17.12                        | 403.05       | 98.53     | 7.8          | 0.885       | 0.001          | 0.001 |
| 65  | negative ion |               |                  | 626.021            | 17.42                        | 95.75        | 38.00     | 6.8          | 0.918       | 0.001          | 0.001 |
| 66  | negative ion |               |                  | 626.321            | 17.40                        | 326957.21    | 101522.97 | 7.4          | 0.881       | 0.001          | 0.001 |
| 67  | negative ion |               |                  | 627.335            | 17.43                        | 61238.59     | 19734.41  | 7.5          | 0.871       | 0.001          | 0.001 |
| 68  | negative ion |               |                  | 628.321            | 17.45                        | 13762.39     | 3573.40   | 7.4          | 0.865       | 0.001          | 0.001 |
| 69  | negative ion |               |                  | 635.632            | 19.12                        | 644.48       | 176.73    | 22.2         | 0.782       | 0.001          | 0.001 |
| 70  | negative ion |               |                  | 655.465            | 19.02                        | 5139.31      | 3105.62   | 6.7          | 0.901       | 0.001          | 0.001 |
| 71  | negative ion |               |                  | 656.444            | 19.02                        | 1645.21      | 976.33    | 6.7          | 0.899       | 0.001          | 0.001 |
| 72  | negative ion |               |                  | 659.511            | 18.90                        | 264.50       | 92.52     | 24.0         | 0.799       | 0.001          | 0.001 |
| 73  | negative ion |               |                  | 677.397            | 19.02                        | 893.53       | 384.04    | 6.8          | 0.889       | 0.001          | 0.001 |
| 74  | negative ion |               |                  | 267.233            | 13.57                        | 164.97       | 38.82     | 18.1         | 0.832       | 0.001          | 0.001 |
| 75  | negative ion |               |                  | 272.218            | 15.68                        | 118.76       | 54.08     | 20.5         | 0.825       | 0.001          | 0.001 |
| 76  | negative ion |               |                  | 275.816            | 18.27                        | 2503.32      | 345.64    | 21.0         | 0.829       | 0.001          | 0.001 |
| 77  | negative ion |               |                  | 278.099            | 15.95                        | 271.48       | 166.82    | 18.3         | 0.830       | 0.001          | 0.001 |
| 78  | negative ion |               |                  | 278.212            | 18.27                        | 56882.76     | 10257.30  | 21.2         | 0.828       | 0.001          | 0.001 |
| 79  | negative ion |               |                  | 293.211            | 15.20                        | 1697.04      | 1124.21   | 18.9         | 0.856       | 0.001          | 0.001 |
| 80  | negative ion |               |                  | 305.242            | 19.58                        | 207410.93    | 31541.48  | 7.3          | 0.868       | 0.001          | 0.001 |
| 81  | negative ion |               |                  | 313.236            | 13.58                        | 2123.89      | 1348.49   | 18.6         | 0.881       | 0.001          | 0.001 |
| 82  | negative ion |               |                  | 314.232            | 13.58                        | 266.29       | 187.39    | 18.7         | 0.873       | 0.001          | 0.001 |
| 83  | negative ion |               |                  | 327.224            | 19.03                        | 450731.35    | 56454.25  | 8.1          | 0.834       | 0.001          | 0.001 |
| 84  | negative ion |               |                  | 327.238            | 19.12                        | 29224.63     | 11473.24  | 6.3          | 0.877       | 0.001          | 0.001 |
| 85  | negative ion |               |                  | 327.672            | 19.50                        | 263.13       | 59.28     | 6.2          | 0.874       | 0.001          | 0.001 |
| 86  | negative ion |               |                  | 329.003            | 19.48                        | 585.72       | 110.62    | 5.5          | 0.793       | 0.001          | 0.001 |
| 87  | negative ion |               |                  | 357.272            | 20.50                        | 7658.06      | 2367.19   | 7.4          | 0.827       | 0.001          | 0.001 |
| 88  | negative ion |               |                  | 358.272            | 20.50                        | 1321.78      | 385.95    | 7.6          | 0.844       | 0.001          | 0.001 |
| 89  | negative ion |               |                  | 389.275            | 18.45                        | 8513.42      | 3935.55   | 19.9         | 0.869       | 0.001          | 0.001 |
| 90  | negative ion |               |                  | 455.294            | 15.70                        | 69.88        | 44.64     | 18.1         | 0.812       | 0.001          | 0.001 |
| 91  | negative ion |               |                  | 501.419            | 18.43                        | 193.03       | 81.45     | 19.7         | 0.844       | 0.001          | 0.001 |
| 92  | negative ion |               |                  | 529.296            | 17.27                        | 1756.45      | 444.73    | 9.6          | 0.852       | 0.001          | 0.001 |
| 93  | negative ion |               |                  | 584.446            | 18.47                        | 505.60       | 177.06    | 20.9         | 0.845       | 0.001          | 0.001 |
| 94  | negative ion |               |                  | 607.464            | 19.03                        | 1514.24      | 304.87    | 7.2          | 0.842       | 0.001          | 0.001 |
| 95  | negative ion |               |                  | 631.443            | 19.03                        | 1281.79      | 300.32    | 7.7          | 0.851       | 0.001          | 0.001 |
| 96  | negative ion |               |                  | 636.615            | 19.12                        | 259.73       | 72.53     | 21.8         | 0.799       | 0.001          | 0.001 |
| 97  | negative ion |               |                  | 303.718            | 19.60                        | 1293.35      | 253.29    | 7.1          | 0.866       | 0.001          | 0.001 |
| 98  | negative ion |               |                  | 328.589            | 19.47                        | 326.73       | 70.61     | 5.2          | 0.824       | 0.001          | 0.001 |
| 99  | negative ion |               |                  | 365.243            | 18.47                        | 202.59       | 62.96     | 19.5         | 0.845       | 0.001          | 0.001 |
| 100 | negative ion |               |                  | 528.279            | 17.28                        | 14283.07     | 3410.55   | 9.5          | 0.846       | 0.001          | 0.001 |
| 101 | negative ion | LysoPC (20:4) | 543.3            | 602.017            | 17.35                        | 188.55       | 65.59     | 8.9          | 0.857       | 0.001          | 0.001 |
| 102 | negative ion |               |                  | 632.451            | 19.03                        | 440.64       | 96.72     | 7.9          | 0.810       | 0.001          | 0.001 |
| 103 | negative ion |               |                  | 347.180            | 15.95                        | 2942.09      | 1784.65   | 18.2         | 0.832       | 0.001          | 0.001 |
| 104 | negative ion |               |                  | 415.226            | 17.58                        | 190.21       | 132.98    | 17.8         | 0.819       | 0.001          | 0.001 |
| 105 | negative ion |               |                  | 432.204            | 16.68                        | 143.58       | 122.04    | 10.2         | 0.814       | 0.001          | 0.001 |
| 106 | negative ion |               |                  | 530.374            | 18.18                        | 1374.27      | 159.46    | 9.3          | 0.786       | 0.001          | 0.001 |
| 107 | negative ion |               |                  | 606.448            | 19.47                        | 515.38       | 183.81    | 7.3          | 0.791       | 0.001          | 0.001 |
| 108 | negative ion |               |                  | 636.511            | 19.13                        | 4222.72      | 1281.80   | 21.7         | 0.798       | 0.001          | 0.001 |
| 109 | negative ion |               |                  | 271.217            | 14.93                        | 2699.61      | 829.03    | 20.4         | 0.822       | 0.001          | 0.001 |

| No. | Mode         | Name          | Molecular weight | Average <i>m/z</i> | Average retention time (min) | Average area | SD area   | Peak time, h | Correlation | <i>P</i> value | FDR   |
|-----|--------------|---------------|------------------|--------------------|------------------------------|--------------|-----------|--------------|-------------|----------------|-------|
| 110 | negative ion |               |                  | 361.186            | 16.67                        | 2030.83      | 1244.24   | 18.0         | 0.814       | 0.001          | 0.001 |
| 111 | negative ion |               |                  | 302.700            | 19.07                        | 707.40       | 79.42     | 13.0         | 0.781       | 0.001          | 0.001 |
| 112 | negative ion |               |                  | 590.305            | 18.22                        | 315.38       | 112.03    | 7.5          | 0.817       | 0.001          | 0.001 |
| 113 | negative ion |               |                  | 635.518            | 19.12                        | 15619.10     | 5433.97   | 21.8         | 0.798       | 0.001          | 0.001 |
| 114 | negative ion |               |                  | 285.301            | 19.73                        | 213.42       | 52.55     | 5.5          | 0.774       | 0.001          | 0.001 |
| 115 | negative ion |               |                  | 305.013            | 19.62                        | 429.06       | 83.27     | 6.1          | 0.779       | 0.001          | 0.001 |
| 116 | negative ion |               |                  | 316.221            | 18.87                        | 2345.52      | 501.71    | 4.3          | 0.786       | 0.001          | 0.001 |
| 117 | negative ion |               |                  | 411.242            | 19.47                        | 493.95       | 85.87     | 6.3          | 0.802       | 0.001          | 0.001 |
| 118 | negative ion |               |                  | 605.424            | 19.05                        | 53.32        | 28.87     | 16.3         | 0.760       | 0.001          | 0.001 |
| 119 | negative ion |               |                  | 637.494            | 19.13                        | 635.78       | 168.22    | 21.6         | 0.798       | 0.001          | 0.001 |
| 120 | negative ion |               |                  | 259.237            | 19.05                        | 4932.97      | 591.47    | 12.5         | 0.740       | 0.001          | 0.001 |
| 121 | negative ion |               |                  | 582.482            | 17.98                        | 1665.76      | 144.72    | 5.9          | 0.791       | 0.001          | 0.001 |
| 122 | negative ion |               |                  | 530.279            | 18.17                        | 24088.60     | 2362.84   | 9.2          | 0.771       | 0.001          | 0.001 |
| 123 | negative ion | LysoPC (20:2) | 547.4            | 606.365            | 19.40                        | 8001.49      | 2697.91   | 7.0          | 0.799       | 0.001          | 0.001 |
| 124 | negative ion |               |                  | 315.222            | 18.90                        | 15615.44     | 3900.23   | 4.1          | 0.777       | 0.001          | 0.001 |
| 125 | negative ion |               |                  | 401.316            | 21.75                        | 342.66       | 374.48    | 20.1         | 0.748       | 0.001          | 0.001 |
| 126 | negative ion |               |                  | 445.408            | 20.32                        | 38.83        | 26.51     | 19.4         | 0.774       | 0.001          | 0.001 |
| 127 | negative ion |               |                  | 598.500            | 18.85                        | 313.28       | 49.32     | 20.4         | 0.771       | 0.001          | 0.001 |
| 128 | negative ion |               |                  | 607.344            | 19.37                        | 1428.89      | 446.19    | 7.0          | 0.771       | 0.001          | 0.001 |
| 129 | negative ion |               |                  | 297.235            | 17.30                        | 1060.40      | 296.29    | 16.6         | 0.767       | 0.001          | 0.002 |
| 130 | negative ion |               |                  | 361.222            | 19.15                        | 1587.67      | 251.50    | 16.9         | 0.779       | 0.001          | 0.002 |
| 131 | negative ion |               |                  | 657.443            | 19.05                        | 446.64       | 139.95    | 5.5          | 0.763       | 0.001          | 0.002 |
| 132 | negative ion | LysoPC (18:1) | 521.3            | 580.033            | 18.58                        | 1217.29      | 223.87    | 6.1          | 0.751       | 0.001          | 0.002 |
| 133 | negative ion |               |                  | 399.254            | 20.93                        | 911.99       | 350.94    | 19.5         | 0.796       | 0.001          | 0.002 |
| 134 | negative ion |               |                  | 347.277            | 20.57                        | 66.75        | 78.55     | 19.2         | 0.741       | 0.001          | 0.002 |
| 135 | negative ion |               |                  | 269.246            | 20.00                        | 27628.91     | 2755.49   | 13.6         | 0.753       | 0.001          | 0.002 |
| 136 | negative ion |               |                  | 457.287            | 14.25                        | 177.72       | 121.91    | 18.0         | 0.769       | 0.001          | 0.002 |
| 137 | negative ion |               |                  | 270.249            | 20.00                        | 2223.62      | 210.57    | 12.9         | 0.724       | 0.001          | 0.003 |
| 138 | negative ion |               |                  | 507.412            | 18.52                        | 892.79       | 236.54    | 6.0          | 0.739       | 0.001          | 0.003 |
| 139 | negative ion |               |                  | 581.469            | 17.98                        | 13108.88     | 1268.01   | 6.5          | 0.720       | 0.001          | 0.003 |
| 140 | negative ion |               |                  | 301.703            | 19.05                        | 3780.29      | 376.48    | 12.6         | 0.692       | 0.001          | 0.003 |
| 141 | negative ion |               |                  | 388.263            | 17.33                        | 238.19       | 106.88    | 21.0         | 0.709       | 0.001          | 0.003 |
| 142 | negative ion |               |                  | 311.276            | 20.00                        | 335.03       | 76.10     | 4.7          | 0.736       | 0.001          | 0.004 |
| 143 | negative ion |               |                  | 387.267            | 17.33                        | 2229.61      | 986.54    | 21.2         | 0.709       | 0.001          | 0.004 |
| 144 | negative ion |               |                  | 302.211            | 18.28                        | 51542.47     | 7727.26   | 0.3          | 0.723       | 0.001          | 0.004 |
| 145 | negative ion |               |                  | 258.231            | 18.27                        | 1627.47      | 193.54    | 0.5          | 0.721       | 0.001          | 0.004 |
| 146 | negative ion |               |                  | 257.220            | 18.28                        | 12024.18     | 1646.18   | 0.5          | 0.719       | 0.001          | 0.004 |
| 147 | negative ion |               |                  | 606.420            | 19.47                        | 135.94       | 39.69     | 7.0          | 0.732       | 0.001          | 0.004 |
| 148 | negative ion |               |                  | 343.190            | 12.60                        | 122.65       | 82.99     | 19.1         | 0.723       | 0.001          | 0.004 |
| 149 | negative ion |               |                  | 302.746            | 19.05                        | 190.05       | 23.92     | 12.9         | 0.720       | 0.001          | 0.004 |
| 150 | negative ion |               |                  | 277.212            | 18.27                        | 343760.84    | 25938.67  | 20.7         | 0.708       | 0.001          | 0.005 |
| 151 | negative ion |               |                  | 387.333            | 17.33                        | 115.34       | 53.59     | 21.5         | 0.693       | 0.001          | 0.005 |
| 152 | negative ion |               |                  | 409.223            | 19.02                        | 707.95       | 134.45    | 7.6          | 0.720       | 0.001          | 0.005 |
| 153 | negative ion |               |                  | 690.432            | 17.28                        | 14586.74     | 1345.28   | 19.4         | 0.729       | 0.001          | 0.005 |
| 154 | negative ion |               |                  | 628.339            | 18.40                        | 754.37       | 225.87    | 6.3          | 0.719       | 0.001          | 0.005 |
| 155 | negative ion |               |                  | 580.349            | 18.57                        | 820445.27    | 113697.08 | 7.0          | 0.705       | 0.001          | 0.005 |
| 156 | negative ion |               |                  | 611.479            | 18.85                        | 193.68       | 60.29     | 21.4         | 0.695       | 0.001          | 0.005 |
| 157 | negative ion |               |                  | 303.216            | 18.28                        | 2867.41      | 292.34    | 0.4          | 0.712       | 0.001          | 0.006 |
| 158 | negative ion |               |                  | 626.321            | 19.22                        | 819.30       | 114.82    | 8.0          | 0.696       | 0.001          | 0.006 |
| 159 | negative ion |               |                  | 508.349            | 18.52                        | 124.40       | 42.87     | 5.4          | 0.707       | 0.001          | 0.006 |
| 160 | negative ion |               |                  | 303.222            | 19.10                        | 404198.50    | 24331.25  | 10.5         | 0.702       | 0.001          | 0.006 |
| 161 | negative ion |               |                  | 597.492            | 18.83                        | 1068.86      | 173.61    | 20.8         | 0.694       | 0.002          | 0.007 |
| 162 | negative ion |               |                  | 580.449            | 18.05                        | 1194.48      | 238.56    | 7.0          | 0.687       | 0.002          | 0.007 |
| 163 | negative ion |               |                  | 400.236            | 20.95                        | 61.51        | 40.98     | 20.2         | 0.688       | 0.002          | 0.007 |
| 164 | negative ion |               |                  | 280.228            | 14.67                        | 1989.29      | 180.70    | 12.6         | 0.678       | 0.002          | 0.007 |
| 165 | negative ion |               |                  | 329.309            | 19.70                        | 707.18       | 150.52    | 5.2          | 0.695       | 0.002          | 0.008 |
| 166 | negative ion |               |                  | 564.301            | 17.28                        | 14590.87     | 1592.32   | 20.1         | 0.675       | 0.002          | 0.008 |
| 167 | negative ion |               |                  | 580.340            | 18.03                        | 37125.78     | 8182.82   | 7.0          | 0.673       | 0.002          | 0.008 |
| 168 | negative ion |               |                  | 252.202            | 17.60                        | 822.16       | 144.98    | 6.0          | 0.687       | 0.002          | 0.008 |
| 169 | negative ion |               |                  | 631.462            | 18.27                        | 1638.61      | 591.39    | 21.4         | 0.685       | 0.002          | 0.009 |
| 170 | negative ion |               |                  | 303.255            | 19.18                        | 2617.81      | 452.96    | 6.5          | 0.687       | 0.002          | 0.009 |
| 171 | negative ion |               |                  | 375.317            | 21.53                        | 1609.00      | 2118.80   | 19.8         | 0.644       | 0.002          | 0.009 |
| 172 | negative ion |               |                  | 691.407            | 17.33                        | 3502.35      | 322.87    | 19.1         | 0.688       | 0.002          | 0.009 |

| No. | Mode         | Name | Molecular weight | Average <i>m/z</i> | Average retention time (min) | Average area | SD area | Peak time, h | Correlation | <i>P</i> value | FDR   |
|-----|--------------|------|------------------|--------------------|------------------------------|--------------|---------|--------------|-------------|----------------|-------|
| 173 | negative ion |      |                  | 416.303            | 18.87                        | 27353.02     | 7027.05 | 22.4         | 0.679       | 0.002          | 0.009 |
| 174 | negative ion |      |                  | 279.388            | 19.07                        | 2453.37      | 304.13  | 19.8         | 0.667       | 0.002          | 0.010 |
| 175 | negative ion |      |                  | 558.299            | 18.65                        | 2073.03      | 254.35  | 8.0          | 0.662       | 0.002          | 0.010 |
| 176 | negative ion |      |                  | 278.430            | 19.08                        | 59.38        | 9.77    | 18.5         | 0.672       | 0.002          | 0.010 |

"Mode" indicates a detection mode of the LC-MS instruction. "Name" and "MW" indicate the name of the substance and its molecular weight, if found. "Average *m/z*", "Average retention time (min)", "Average area", and "SD area" indicate a mean *m/z* value, a mean retention time, a mean area, and a standard deviation area of 24 time points (LD 12 time points + DD 12 time points) for associated peaks, respectively. The "Peak time", "Correlation", "*P* value," and "FDR" indicate the results of the statistical analysis of the circadian oscillation and represent a peak time of circadian oscillation, the maximum Pearson's correlation to a fitted cosine curve, *P* value, and FDR estimations of its significance, respectively. *P* values and FDRs were rounded up, and the other values were rounded off. LysoPC, lysophosphatidylcholine (positive ion [M + H<sup>+</sup>]<sup>+</sup>, negative ion [M + CH<sub>3</sub>COO]<sup>-</sup>).

**Table S2. Results of the BT estimations using LC-MS**

| Strain  | Age   | Sex    | LD/DD      | Feeding             | Condition             | Peak (used/all) | ZT/CT, h | BT, h | Difference, h | Correlation | P value | Figure    |
|---------|-------|--------|------------|---------------------|-----------------------|-----------------|----------|-------|---------------|-------------|---------|-----------|
| CBA/N   | Young | male   | LD<br>(ZT) | <i>ad lib</i>       | entrained             | 93/161          | 0        | 23.5  | 0.5           | 0.664       | 0.001   | Fig. 2, 4 |
|         |       |        |            |                     |                       | 91/160          | 4        | 3.0   | 1.0           | 0.465       | 0.001   | Fig.2     |
|         |       |        |            |                     |                       | 85/152          | 8        | 6.4   | 1.6           | 0.810       | 0.001   | Fig.2     |
|         |       |        |            |                     |                       | 93/161          | 12       | 11.5  | 0.5           | 0.664       | 0.001   | Fig.2, 4  |
|         |       |        |            |                     |                       | 92/160          | 16       | 15.0  | 1.0           | 0.465       | 0.001   | Fig.2     |
| CBA/N   | Young | male   | DD<br>(CT) | <i>ad lib</i>       | entrained             | 83/152          | 20       | 18.4  | 1.6           | 0.810       | 0.001   | Fig.2     |
|         |       |        |            |                     |                       | 94/160          | 0        | 0.8   | 0.8           | 0.541       | 0.001   | Fig.2     |
|         |       |        |            |                     |                       | 84/158          | 4        | 2.7   | 1.3           | 0.509       | 0.001   | Fig.2     |
|         |       |        |            |                     |                       | 97/159          | 8        | 6.2   | 1.8           | 0.840       | 0.001   | Fig.2     |
|         |       |        |            |                     |                       | 94/160          | 12       | 12.8  | 0.8           | 0.541       | 0.001   | Fig.2     |
| C57Bl/6 | Young | male   | LD<br>(ZT) | <i>ad lib</i>       | entrained             | 90/158          | 16       | 14.7  | 1.3           | 0.509       | 0.001   | Fig.2     |
|         |       |        |            |                     |                       | 97/159          | 20       | 18.2  | 1.8           | 0.840       | 0.001   | Fig.2     |
|         |       |        |            |                     |                       | 99/160          | 0        | 22.0  | 2.0           | 0.812       | 0.001   | Fig.3     |
|         |       |        |            |                     |                       | 96/155          | 4        | 2.4   | 1.6           | 0.774       | 0.001   | Fig.3     |
|         |       |        |            |                     |                       | 94/159          | 8        | 9.2   | 1.2           | 0.867       | 0.001   | Fig.3     |
| C57Bl/6 | Young | male   | DD<br>(CT) | <i>ad lib</i>       | entrained             | 97/160          | 12       | 10.0  | 2.0           | 0.812       | 0.001   | Fig.3     |
|         |       |        |            |                     |                       | 98/155          | 16       | 14.4  | 1.6           | 0.774       | 0.001   | Fig.3     |
|         |       |        |            |                     |                       | 91/159          | 20       | 21.2  | 1.2           | 0.867       | 0.001   | Fig.3     |
|         |       |        |            |                     |                       | 93/153          | 0        | 22.0  | 2.0           | 0.638       | 0.001   | Fig.3     |
|         |       |        |            |                     |                       | 93/160          | 4        | 2.5   | 1.5           | 0.823       | 0.001   | Fig.3     |
| CBA/N   | Young | male   | LD<br>(ZT) | Food<br>deprivation | entrained             | 100/161         | 8        | 6.4   | 1.6           | 0.884       | 0.001   | Fig.3     |
|         |       |        |            |                     |                       | 94/153          | 12       | 10.0  | 2.0           | 0.638       | 0.001   | Fig.3     |
|         |       |        |            |                     |                       | 96/160          | 16       | 14.5  | 1.5           | 0.823       | 0.001   | Fig.3     |
|         |       |        |            |                     |                       | 101/161         | 20       | 18.4  | 1.6           | 0.884       | 0.001   | Fig.3     |
|         |       |        |            |                     |                       | 98/161          | 0        | 1.6   | 1.6           | 0.459       | 0.001   | Fig.4     |
| CBA/N   | Young | male   | LD<br>(ZT) | Food<br>deprivation | entrained             | 98/161          | 4        | 1.7   | 2.3           | 0.336       | 0.006   | Fig.4     |
|         |       |        |            |                     |                       | 105/161         | 8        | 5.3   | 2.7           | 0.277       | 0.019   | Fig.4     |
|         |       |        |            |                     |                       | 99/161          | 12       | 13.6  | 1.6           | 0.459       | 0.001   | Fig.4     |
|         |       |        |            |                     |                       | 99/161          | 16       | 13.7  | 2.3           | 0.336       | 0.005   | Fig.4     |
|         |       |        |            |                     |                       | 105/161         | 20       | 17.3  | 2.7           | 0.277       | 0.016   | Fig.4     |
| CBA/N   | Aged  | male   | LD<br>(ZT) | <i>ad lib</i>       | entrained             | 98/161          | 0        | 23.0  | 1.0           | 0.636       | 0.001   | Fig.4     |
|         |       |        |            |                     |                       | 95/160          | 12       | 11.0  | 1.0           | 0.636       | 0.001   | Fig.4     |
| CBA/N   | Young | female | LD<br>(ZT) | <i>ad lib</i>       | entrained             | 100/160         | 0        | 1.2   | 1.2           | 0.734       | 0.001   | Fig.4     |
|         |       |        |            |                     |                       | 100/160         | 12       | 13.2  | 1.2           | 0.734       | 0.001   | Fig.4     |
| CBA/N   | Young | male   | LD<br>(ZT) | <i>ad lib</i>       | Jet-lagged<br>(Day1)  | 89/153          | 0*       | 23.8  | 0.2           | 0.814       | 0.001   | Fig.5     |
|         |       |        |            |                     |                       | 87/153          | 12*      | 11.8  | 0.2           | 0.814       | 0.001   | Fig.5     |
|         |       |        |            |                     |                       | 89/155          | 0*       | 0.9   | 0.9           | 0.586       | 0.001   | Fig.S2    |
|         |       |        |            |                     |                       | 92/155          | 12*      | 12.9  | 0.9           | 0.586       | 0.001   | Fig.S2    |
| CBA/N   | Young | male   | LD<br>(ZT) | <i>ad lib</i>       | Jet-lagged<br>(Day5)  | 87/151          | 0*       | 3.5   | 3.5           | 0.573       | 0.001   | Fig.5     |
|         |       |        |            |                     |                       | 87/151          | 12*      | 15.5  | 3.5           | 0.573       | 0.001   | Fig.5     |
|         |       |        |            |                     |                       | 84/160          | 0*       | 3.2   | 3.2           | 0.563       | 0.001   | Fig.S2    |
| CBA/N   | Young | male   | LD<br>(ZT) | <i>ad lib</i>       | Jet-lagged<br>(Day14) | 84/160          | 12*      | 15.2  | 3.2           | 0.563       | 0.001   | Fig.S2    |
|         |       |        |            |                     |                       | 94/161          | 0*       | 8.8   | 8.8           | 0.889       | 0.001   | Fig.5     |
| CBA/N   | Young | male   | LD<br>(ZT) | <i>ad lib</i>       | Jet-lagged<br>(Day14) | 94/161          | 12*      | 20.8  | 8.8           | 0.889       | 0.001   | Fig.5     |

The "Peak" indicates as used peaks number ("Used") over associated oscillatory peaks in the samples ("All"). "ZT/CT" indicates environmental time in ZT (LD conditions) or CT (DD conditions) when the sample was taken. The "Difference" is determined as follows: BT - (environmental time). Asterisks (\*) indicates the zeitgeber time in original LD cycles before mice were released into new LD cycle in jet-lag experiments. See [Table S1](#) for used oscillatory peaks information (metabolite timetable). See also *Materials and Methods* for details. LD, light-dark; DD, constant dark; ZT, zeitgeber time; CT, circadian time.

Table S3. Metabolite timetable for the oscillatory substances in CBA/N mice plasma analyzed by CE-MS

| No. | Name                   | Average<br><i>m/z</i> | Average<br>MT | Average<br>area/area<br>(I51) | SD area/area<br>(I51) | Peak time<br>(h) | Correlation | <i>P</i> value | FDR   |
|-----|------------------------|-----------------------|---------------|-------------------------------|-----------------------|------------------|-------------|----------------|-------|
| 1   | Trimethylamine N-oxide | 76.08                 | 8.56          | 0.02                          | 0.01                  | 20.3             | 0.901       | 0.001          | 0.003 |
| 2   |                        | 147.38                | 13.41         | 0.00                          | 0.00                  | 17.8             | 0.819       | 0.001          | 0.003 |
| 3   |                        | 161.13                | 9.16          | 0.01                          | 0.00                  | 20.7             | 0.852       | 0.001          | 0.003 |
| 4   |                        | 259.09                | 12.85         | 0.00                          | 0.00                  | 6.8              | 0.890       | 0.001          | 0.003 |
| 5   |                        | 61.04                 | 24.05         | 3.33                          | 0.55                  | 19.3             | 0.812       | 0.001          | 0.004 |
| 6   |                        | 134.11                | 12.80         | 0.00                          | 0.00                  | 18.7             | 0.802       | 0.001          | 0.004 |
| 7   |                        | 381.10                | 24.88         | 0.01                          | 0.00                  | 7.3              | 0.788       | 0.001          | 0.004 |
| 8   |                        | 121.07                | 24.05         | 0.17                          | 0.05                  | 19.3             | 0.804       | 0.001          | 0.004 |
| 9   | Glutamine              | 147.08                | 13.41         | 1.08                          | 0.12                  | 17.7             | 0.804       | 0.001          | 0.004 |
| 10  | 2-Aminobutyrate        | 104.07                | 12.16         | 0.01                          | 0.00                  | 19.2             | 0.814       | 0.001          | 0.004 |
| 11  |                        | 148.08                | 13.40         | 0.06                          | 0.01                  | 17.9             | 0.802       | 0.001          | 0.004 |
| 12  | Cytidine               | 244.09                | 12.18         | 0.01                          | 0.00                  | 7.3              | 0.791       | 0.001          | 0.004 |
| 13  |                        | 261.14                | 15.78         | 0.01                          | 0.00                  | 19.2             | 0.780       | 0.001          | 0.004 |
| 14  | Sarcosine              | 90.06                 | 11.97         | 0.00                          | 0.00                  | 18.0             | 0.814       | 0.001          | 0.004 |
| 15  |                        | 144.10                | 14.29         | 0.04                          | 0.01                  | 19.5             | 0.798       | 0.001          | 0.004 |
| 16  |                        | 147.28                | 13.41         | 0.01                          | 0.00                  | 17.9             | 0.808       | 0.001          | 0.004 |
| 17  |                        | 62.04                 | 24.05         | 0.06                          | 0.01                  | 19.4             | 0.793       | 0.001          | 0.004 |
| 18  |                        | 143.05                | 24.04         | 0.14                          | 0.02                  | 19.3             | 0.808       | 0.001          | 0.004 |
| 19  |                        | 265.06                | 24.02         | 0.01                          | 0.00                  | 19.9             | 0.803       | 0.001          | 0.005 |
| 20  |                        | 84.05                 | 13.40         | 0.02                          | 0.00                  | 17.7             | 0.786       | 0.001          | 0.005 |
| 21  |                        | 130.05                | 13.40         | 0.07                          | 0.01                  | 17.8             | 0.773       | 0.001          | 0.005 |
| 22  |                        | 83.02                 | 24.02         | 0.25                          | 0.04                  | 19.3             | 0.777       | 0.001          | 0.005 |
| 23  |                        | 72.08                 | 12.58         | 0.13                          | 0.03                  | 18.5             | 0.779       | 0.001          | 0.005 |
| 24  | Carnitine              | 162.11                | 10.84         | 0.18                          | 0.02                  | 7.2              | 0.773       | 0.001          | 0.005 |
| 25  |                        | 132.29                | 12.80         | 0.00                          | 0.00                  | 20.0             | 0.839       | 0.001          | 0.005 |
| 26  | Valine                 | 118.09                | 12.58         | 1.27                          | 0.31                  | 18.6             | 0.775       | 0.001          | 0.005 |
| 27  |                        | 168.08                | 10.07         | 0.01                          | 0.00                  | 21.2             | 0.763       | 0.001          | 0.006 |
| 28  |                        | 276.12                | 15.87         | 0.01                          | 0.00                  | 19.1             | 0.772       | 0.001          | 0.006 |
| 29  |                        | 86.10                 | 12.81         | 0.06                          | 0.01                  | 19.2             | 0.762       | 0.001          | 0.007 |
| 30  |                        | 383.12                | 24.89         | 0.14                          | 0.01                  | 7.2              | 0.758       | 0.001          | 0.007 |
| 31  | Tryptophan             | 205.10                | 13.70         | 0.24                          | 0.06                  | 18.9             | 0.756       | 0.001          | 0.007 |
| 32  |                        | 138.06                | 13.09         | 0.01                          | 0.00                  | 19.1             | 0.766       | 0.001          | 0.008 |
| 33  | 4-Guanidinobutyrate    | 146.09                | 10.56         | 0.00                          | 0.00                  | 20.1             | 0.749       | 0.001          | 0.008 |
| 34  |                        | 145.05                | 24.93         | 0.21                          | 0.01                  | 7.6              | 0.755       | 0.001          | 0.009 |
| 35  | Isoleucine             | 132.10                | 12.80         | 0.68                          | 0.16                  | 18.8             | 0.749       | 0.001          | 0.009 |
| 36  |                        | 119.09                | 12.58         | 0.06                          | 0.02                  | 18.6             | 0.756       | 0.001          | 0.009 |
| 37  |                        | 248.15                | 12.39         | 0.00                          | 0.00                  | 7.0              | 0.748       | 0.001          | 0.009 |
| 38  |                        | 132.10                | 12.78         | 0.68                          | 0.16                  | 18.8             | 0.750       | 0.001          | 0.009 |
| 39  |                        | 817.85                | 6.87          | 0.00                          | 0.00                  | 6.6              | 0.779       | 0.001          | 0.010 |
| 40  |                        | 206.10                | 13.70         | 0.03                          | 0.01                  | 18.8             | 0.744       | 0.001          | 0.010 |
| 41  |                        | 133.11                | 12.80         | 0.04                          | 0.01                  | 18.8             | 0.736       | 0.001          | 0.010 |
| 42  |                        | 203.05                | 24.94         | 0.24                          | 0.02                  | 7.5              | 0.719       | 0.001          | 0.010 |
| 43  |                        | 133.11                | 12.80         | 0.04                          | 0.01                  | 18.9             | 0.741       | 0.001          | 0.010 |
| 44  |                        | 204.06                | 24.90         | 0.02                          | 0.00                  | 7.5              | 0.750       | 0.001          | 0.010 |
| 45  |                        | 152.58                | 11.08         | 0.00                          | 0.00                  | 22.9             | 0.712       | 0.001          | 0.011 |
| 46  |                        | 188.07                | 13.70         | 0.02                          | 0.00                  | 18.9             | 0.726       | 0.001          | 0.011 |
| 47  |                        | 360.08                | 24.90         | 0.02                          | 0.00                  | 9.8              | 0.724       | 0.001          | 0.011 |
| 48  |                        | 296.15                | 11.34         | 0.00                          | 0.00                  | 19.8             | 0.733       | 0.001          | 0.011 |
| 49  |                        | 207.10                | 13.70         | 0.00                          | 0.00                  | 18.8             | 0.731       | 0.001          | 0.011 |
| 50  | 3-Methylhistidine      | 170.09                | 9.64          | 0.02                          | 0.00                  | 9.8              | 0.724       | 0.001          | 0.011 |
| 51  |                        | 387.60                | 24.93         | 0.03                          | 0.00                  | 6.4              | 0.718       | 0.001          | 0.012 |
| 52  |                        | 133.11                | 12.92         | 0.07                          | 0.02                  | 19.2             | 0.721       | 0.001          | 0.013 |
| 53  |                        | 258.90                | 5.40          | 0.00                          | 0.00                  | 4.2              | 0.715       | 0.001          | 0.013 |
| 54  |                        | 107.05                | 12.54         | 0.01                          | 0.00                  | 10.3             | 0.691       | 0.001          | 0.013 |
| 55  |                        | 134.11                | 12.91         | 0.01                          | 0.00                  | 19.0             | 0.710       | 0.001          | 0.013 |
| 56  | Leucine                | 132.10                | 12.92         | 1.32                          | 0.32                  | 18.9             | 0.711       | 0.001          | 0.014 |
| 57  |                        | 154.08                | 12.81         | 0.01                          | 0.00                  | 19.0             | 0.712       | 0.001          | 0.014 |
| 58  | Proline                | 116.07                | 13.49         | 0.31                          | 0.07                  | 18.3             | 0.713       | 0.001          | 0.015 |
| 59  |                        | 85.03                 | 24.93         | 0.14                          | 0.01                  | 7.3              | 0.720       | 0.001          | 0.015 |
| 60  |                        | 162.13                | 9.16          | 0.00                          | 0.00                  | 19.9             | 0.717       | 0.001          | 0.015 |
| 61  |                        | 380.11                | 24.93         | 0.05                          | 0.01                  | 6.0              | 0.715       | 0.001          | 0.015 |
| 62  |                        | 140.07                | 12.58         | 0.01                          | 0.00                  | 18.3             | 0.707       | 0.001          | 0.015 |



| No. | Name                   | Average<br><i>m/z</i> | Average<br>MT | Average<br>area/area<br>(I51) | SD area/area<br>(I51) | Peak time<br>(h) | Correlation | <i>P</i> value | FDR   |
|-----|------------------------|-----------------------|---------------|-------------------------------|-----------------------|------------------|-------------|----------------|-------|
| 63  |                        | 860.84                | 6.84          | 0.00                          | 0.00                  | 10.3             | 0.710       | 0.001          | 0.015 |
| 64  | Guanidoacetate         | 118.06                | 10.51         | 0.01                          | 0.00                  | 6.2              | 0.709       | 0.002          | 0.015 |
| 65  |                        | 133.11                | 12.92         | 0.07                          | 0.02                  | 19.1             | 0.699       | 0.002          | 0.015 |
| 66  |                        | 915.32                | 6.91          | 0.00                          | 0.00                  | 5.4              | 0.711       | 0.002          | 0.016 |
| 67  |                        | 132.10                | 12.92         | 1.29                          | 0.31                  | 18.8             | 0.699       | 0.002          | 0.016 |
| 68  |                        | 290.08                | 24.90         | 0.04                          | 0.00                  | 6.2              | 0.715       | 0.002          | 0.016 |
| 69  |                        | 276.16                | 12.15         | 0.00                          | 0.00                  | 8.3              | 0.689       | 0.002          | 0.016 |
| 70  |                        | 295.15                | 11.34         | 0.01                          | 0.00                  | 19.4             | 0.707       | 0.002          | 0.017 |
| 71  |                        | 384.12                | 24.93         | 0.02                          | 0.00                  | 7.8              | 0.689       | 0.002          | 0.017 |
| 72  | 1-Methylnicotinamide   | 137.07                | 9.46          | 0.00                          | 0.00                  | 5.0              | 0.689       | 0.002          | 0.017 |
| 73  |                        | 86.10                 | 12.92         | 0.10                          | 0.02                  | 18.8             | 0.696       | 0.002          | 0.018 |
| 74  |                        | 160.13                | 10.74         | 0.02                          | 0.00                  | 8.6              | 0.681       | 0.002          | 0.018 |
| 75  |                        | 309.17                | 11.15         | 0.02                          | 0.00                  | 22.5             | 0.686       | 0.002          | 0.018 |
| 76  |                        | 70.07                 | 13.49         | 0.02                          | 0.00                  | 18.2             | 0.686       | 0.002          | 0.019 |
| 77  |                        | 191.14                | 9.74          | 0.01                          | 0.00                  | 18.4             | 0.698       | 0.002          | 0.019 |
| 78  |                        | 252.18                | 12.58         | 0.00                          | 0.00                  | 18.0             | 0.674       | 0.002          | 0.021 |
| 79  |                        | 157.08                | 9.41          | 0.02                          | 0.00                  | 21.1             | 0.677       | 0.002          | 0.023 |
| 80  |                        | 242.03                | 24.76         | 0.00                          | 0.00                  | 16.1             | 0.649       | 0.002          | 0.023 |
| 81  |                        | 205.12                | 11.65         | 0.00                          | 0.00                  | 20.1             | 0.665       | 0.003          | 0.027 |
| 82  | Citrulline             | 176.10                | 13.75         | 0.14                          | 0.02                  | 19.9             | 0.668       | 0.003          | 0.027 |
| 83  |                        | 61.15                 | 24.02         | 0.20                          | 0.11                  | 19.1             | 0.715       | 0.003          | 0.027 |
| 84  |                        | 218.14                | 11.78         | 0.00                          | 0.00                  | 14.8             | 0.664       | 0.003          | 0.028 |
| 85  |                        | 247.13                | 15.55         | 0.00                          | 0.00                  | 17.9             | 0.675       | 0.003          | 0.028 |
| 86  |                        | 939.83                | 6.82          | 0.00                          | 0.00                  | 7.4              | 0.694       | 0.003          | 0.029 |
| 87  | Creatinine             | 114.07                | 9.40          | 0.01                          | 0.00                  | 18.7             | 0.659       | 0.003          | 0.029 |
| 88  |                        | 295.13                | 15.91         | 0.00                          | 0.00                  | 18.9             | 0.680       | 0.003          | 0.029 |
| 89  |                        | 145.11                | 14.29         | 0.00                          | 0.00                  | 19.3             | 0.661       | 0.003          | 0.031 |
| 90  |                        | 69.04                 | 24.89         | 0.03                          | 0.00                  | 7.0              | 0.657       | 0.004          | 0.032 |
| 91  |                        | 276.22                | 12.95         | 0.17                          | 0.01                  | 7.4              | 0.649       | 0.004          | 0.035 |
| 92  |                        | 106.95                | 5.40          | 0.02                          | 0.00                  | 3.9              | 0.649       | 0.004          | 0.035 |
| 93  |                        | 266.20                | 12.92         | 0.01                          | 0.00                  | 18.5             | 0.654       | 0.004          | 0.035 |
| 94  |                        | 117.07                | 13.49         | 0.02                          | 0.00                  | 18.0             | 0.652       | 0.004          | 0.035 |
| 95  |                        | 477.16                | 13.40         | 0.00                          | 0.00                  | 18.4             | 0.686       | 0.004          | 0.035 |
| 96  |                        | 352.58                | 24.86         | 0.03                          | 0.00                  | 8.3              | 0.650       | 0.004          | 0.037 |
| 97  |                        | 159.04                | 5.40          | 0.02                          | 0.00                  | 8.1              | 0.647       | 0.004          | 0.039 |
| 98  |                        | 475.07                | 24.81         | 0.01                          | 0.00                  | 14.5             | 0.635       | 0.005          | 0.041 |
| 99  | Glycine                | 76.04                 | 10.61         | 0.19                          | 0.02                  | 12.1             | 0.623       | 0.005          | 0.043 |
| 100 |                        | 340.87                | 5.40          | 0.00                          | 0.00                  | 6.0              | 0.659       | 0.005          | 0.043 |
| 101 |                        | 263.15                | 11.22         | 0.01                          | 0.00                  | 14.9             | 0.635       | 0.005          | 0.046 |
| 102 |                        | 149.08                | 13.39         | 0.01                          | 0.00                  | 17.4             | 0.616       | 0.006          | 0.047 |
| 103 |                        | 380.60                | 24.90         | 0.02                          | 0.00                  | 6.6              | 0.635       | 0.006          | 0.049 |
| 104 |                        | 132.39                | 12.92         | 0.01                          | 0.00                  | 19.2             | 0.634       | 0.006          | 0.050 |
| 105 |                        | 159.08                | 13.75         | 0.01                          | 0.00                  | 20.5             | 0.630       | 0.006          | 0.050 |
| 106 |                        | 514.88                | 6.82          | 0.00                          | 0.00                  | 6.3              | 0.621       | 0.006          | 0.050 |
| 107 |                        | 177.11                | 13.75         | 0.01                          | 0.00                  | 20.1             | 0.622       | 0.006          | 0.050 |
| 108 |                        | 317.10                | 13.40         | 0.00                          | 0.00                  | 17.7             | 0.624       | 0.006          | 0.050 |
| 109 | Methionine sulfoxide   | 166.05                | 14.64         | 0.01                          | 0.00                  | 16.8             | 0.655       | 0.006          | 0.051 |
| 110 |                        | 95.06                 | 24.91         | 0.04                          | 0.00                  | 11.3             | 0.618       | 0.006          | 0.052 |
| 111 | $\alpha$ -Aminoadipate | 162.08                | 13.65         | 0.00                          | 0.00                  | 19.8             | 0.621       | 0.007          | 0.056 |
| 112 |                        | 154.08                | 12.92         | 0.01                          | 0.00                  | 19.1             | 0.624       | 0.007          | 0.056 |
| 113 |                        | 416.20                | 11.24         | 0.00                          | 0.00                  | 15.1             | 0.616       | 0.007          | 0.057 |
| 114 |                        | 277.22                | 12.81         | 0.01                          | 0.00                  | 7.3              | 0.640       | 0.007          | 0.058 |
| 115 |                        | 192.91                | 5.41          | 0.00                          | 0.00                  | 3.7              | 0.613       | 0.007          | 0.058 |
| 116 |                        | 297.57                | 24.99         | 0.03                          | 0.00                  | 7.4              | 0.636       | 0.008          | 0.059 |
| 117 |                        | 90.06                 | 11.22         | 0.01                          | 0.00                  | 14.9             | 0.619       | 0.008          | 0.059 |
| 118 | Methionine             | 150.06                | 13.37         | 0.21                          | 0.05                  | 18.8             | 0.620       | 0.008          | 0.059 |
| 119 |                        | 398.11                | 24.91         | 0.03                          | 0.00                  | 8.0              | 0.603       | 0.008          | 0.059 |
| 120 |                        | 121.57                | 8.86          | 0.00                          | 0.00                  | 16.5             | 0.619       | 0.008          | 0.059 |
| 121 |                        | 245.09                | 24.83         | 0.02                          | 0.00                  | 8.3              | 0.612       | 0.008          | 0.059 |
| 122 |                        | 995.48                | 6.83          | 0.00                          | 0.00                  | 23.7             | 0.665       | 0.008          | 0.061 |
| 123 |                        | 91.04                 | 25.51         | 0.02                          | 0.00                  | 18.7             | 0.627       | 0.008          | 0.061 |
| 124 | Phenylalanine          | 166.09                | 13.79         | 0.40                          | 0.07                  | 18.7             | 0.614       | 0.008          | 0.061 |
| 125 | N,N-Dimethylglycine    | 104.07                | 13.63         | 0.01                          | 0.00                  | 16.5             | 0.617       | 0.008          | 0.061 |

| No. | Name                | Average<br><i>m/z</i> | Average<br>MT | Average<br>area/area<br>(IS1) | SD area/area<br>(IS1) | Peak time<br>(h) | Correlation | <i>P</i> value | FDR   |
|-----|---------------------|-----------------------|---------------|-------------------------------|-----------------------|------------------|-------------|----------------|-------|
| 126 |                     | 908.83                | 6.89          | 0.00                          | 0.00                  | 18.8             | 0.619       | 0.009          | 0.062 |
| 127 |                     | 152.06                | 13.37         | 0.01                          | 0.00                  | 19.3             | 0.616       | 0.009          | 0.063 |
| 128 |                     | 121.07                | 8.94          | 0.01                          | 0.00                  | 15.9             | 0.609       | 0.009          | 0.063 |
| 129 |                     | 70.07                 | 8.83          | 0.01                          | 0.00                  | 18.4             | 0.603       | 0.010          | 0.067 |
| 130 |                     | 852.84                | 6.89          | 0.00                          | 0.00                  | 13.6             | 0.603       | 0.010          | 0.067 |
| 131 |                     | 116.07                | 8.83          | 0.02                          | 0.01                  | 18.6             | 0.600       | 0.010          | 0.067 |
| 132 |                     | 110.07                | 9.40          | 0.01                          | 0.00                  | 20.4             | 0.603       | 0.010          | 0.072 |
| 133 |                     | 295.06                | 25.51         | 0.06                          | 0.01                  | 19.8             | 0.600       | 0.011          | 0.073 |
| 134 | Thr <sup>13</sup> C | 121.07                | 13.14         | 0.01                          | 0.00                  | 18.2             | 0.597       | 0.011          | 0.074 |
| 135 |                     | 225.04                | 25.51         | 0.01                          | 0.00                  | 18.8             | 0.597       | 0.011          | 0.074 |
| 136 |                     | 134.10                | 8.83          | 0.01                          | 0.00                  | 18.5             | 0.594       | 0.011          | 0.074 |
| 137 |                     | 151.06                | 13.37         | 0.01                          | 0.00                  | 19.2             | 0.601       | 0.011          | 0.075 |
| 138 |                     | 276.87                | 5.41          | 0.00                          | 0.00                  | 4.0              | 0.589       | 0.011          | 0.075 |
| 139 |                     | 325.11                | 24.93         | 0.07                          | 0.01                  | 7.5              | 0.615       | 0.011          | 0.075 |
| 140 | Threonine           | 120.07                | 13.14         | 0.33                          | 0.06                  | 17.8             | 0.592       | 0.012          | 0.075 |
| 141 | Ornithine           | 133.10                | 8.83          | 0.24                          | 0.08                  | 18.6             | 0.594       | 0.012          | 0.075 |
| 142 |                     | 396.83                | 5.39          | 0.00                          | 0.00                  | 3.8              | 0.601       | 0.012          | 0.075 |
| 143 |                     | 167.09                | 13.79         | 0.03                          | 0.01                  | 18.8             | 0.593       | 0.012          | 0.075 |
| 144 |                     | 385.09                | 24.95         | 0.17                          | 0.02                  | 7.1              | 0.600       | 0.012          | 0.076 |
| 145 |                     | 190.91                | 5.39          | 0.01                          | 0.00                  | 3.6              | 0.586       | 0.012          | 0.078 |
| 146 |                     | 277.22                | 12.95         | 0.02                          | 0.00                  | 8.4              | 0.585       | 0.013          | 0.081 |
| 147 |                     | 131.57                | 10.82         | 0.00                          | 0.00                  | 19.1             | 0.621       | 0.013          | 0.081 |
| 148 |                     | 262.55                | 24.88         | 0.02                          | 0.00                  | 9.2              | 0.583       | 0.014          | 0.086 |
| 149 |                     | 138.58                | 10.93         | 0.00                          | 0.00                  | 0.2              | 0.577       | 0.014          | 0.088 |
| 150 |                     | 200.55                | 25.29         | 0.00                          | 0.00                  | 5.8              | 0.590       | 0.014          | 0.089 |
| 151 | Hydroxyproline      | 132.07                | 14.85         | 0.03                          | 0.00                  | 11.9             | 0.577       | 0.015          | 0.092 |
| 152 |                     | 108.95                | 5.41          | 0.00                          | 0.00                  | 4.5              | 0.581       | 0.015          | 0.093 |
| 153 | Creatine            | 132.08                | 11.21         | 1.35                          | 0.25                  | 14.7             | 0.578       | 0.016          | 0.097 |

The "Name" column indicate the name of the substance if found. The "Average *m/z*", "Average MT", "Average area/area (IS1)", "SD area/area (IS1)" columns indicate a mean *m/z* value, a mean retention time, a mean area and a standard deviation area divided by the area of an internal standard (methionine sulfone) of 24 time points (LD 12 time points + DD 12 time points) for each associated peaks, respectively. "Peak time", "Correlation", "P value" and "FDR" indicate the results of the statistical analysis of the circadian oscillation and represent a peak time of circadian oscillation, the maximum Pearson's correlation to a fitted cosine curve, P value and FDR estimations of its significance, respectively. P values and FDRs were rounded up and the other values were rounded off. All 153 peaks information was used to estimate BT (FDR < 0.1, Fig. S3 A–D). For BT estimation using much severer condition (FDR < 0.01), 44 peaks information (no.1-4) was used (Fig. S3 E–H).

**Table S4. Results of the BT estimations using CE-MS**

| Strain                | Age   | Sex  | LD/DD      | Feeding | Condition | Peak (used/all) | ZT/CT (h) | BT (h) | Difference (h) | Correlation | P value | Figure  |
|-----------------------|-------|------|------------|---------|-----------|-----------------|-----------|--------|----------------|-------------|---------|---------|
| CBA/N<br>(FDR < 0.1)  | Young | Male | LD<br>(ZT) | ad lib  | entrained | 100/129         | 0         | 0.7    | 0.7            | 0.519       | 0.001   | Fig. S3 |
|                       |       |      |            |         |           | 97/127          | 4         | 4.2    | 0.2            | 0.638       | 0.001   | Fig. S3 |
|                       |       |      |            |         |           | 97/127          | 8         | 7.2    | 0.8            | 0.830       | 0.001   | Fig. S3 |
|                       |       |      |            |         |           | 100/129         | 12        | 12.7   | 0.7            | 0.519       | 0.001   | Fig. S3 |
|                       |       |      |            |         |           | 97/127          | 16        | 16.2   | 0.2            | 0.638       | 0.001   | Fig. S3 |
|                       |       |      |            |         |           | 97/127          | 20        | 19.2   | 0.8            | 0.830       | 0.001   | Fig. S3 |
| CBA/N<br>(FDR < 0.1)  | Young | Male | DD<br>(CT) | ad lib  | entrained | 98/132          | 0         | 23.7   | 0.3            | 0.523       | 0.001   | Fig. S3 |
|                       |       |      |            |         |           | 99/129          | 4         | 3.8    | 0.2            | 0.738       | 0.001   | Fig. S3 |
|                       |       |      |            |         |           | 99/129          | 8         | 6.7    | 1.3            | 0.755       | 0.001   | Fig. S3 |
|                       |       |      |            |         |           | 98/132          | 12        | 11.7   | 0.3            | 0.523       | 0.001   | Fig. S3 |
|                       |       |      |            |         |           | 99/129          | 16        | 15.8   | 0.2            | 0.738       | 0.001   | Fig. S3 |
|                       |       |      |            |         |           | 99/129          | 20        | 18.7   | 1.3            | 0.755       | 0.001   | Fig. S3 |
| CBA/N<br>(FDR < 0.01) | Young | Male | LD<br>(ZT) | ad lib  | entrained | 31/39           | 0         | 0.5    | 0.5            | 0.598       | 0.002   | Fig. S3 |
|                       |       |      |            |         |           | 30/39           | 4         | 1.9    | 2.1            | 0.872       | 0.001   | Fig. S3 |
|                       |       |      |            |         |           | 31/38           | 8         | 6.2    | 1.8            | 0.878       | 0.001   | Fig. S3 |
|                       |       |      |            |         |           | 31/39           | 12        | 12.5   | 0.5            | 0.598       | 0.003   | Fig. S3 |
|                       |       |      |            |         |           | 30/39           | 16        | 13.9   | 2.1            | 0.872       | 0.001   | Fig. S3 |
|                       |       |      |            |         |           | 31/38           | 20        | 18.2   | 1.8            | 0.878       | 0.001   | Fig. S3 |
| CBA/N<br>(FDR < 0.01) | Young | Male | DD<br>(CT) | ad lib  | entrained | 31/41           | 0         | 0.5    | 0.5            | 0.605       | 0.003   | Fig. S3 |
|                       |       |      |            |         |           | 32/41           | 4         | 2.7    | 1.3            | 0.729       | 0.001   | Fig. S3 |
|                       |       |      |            |         |           | 29/39           | 8         | 5.5    | 2.5            | 0.897       | 0.001   | Fig. S3 |
|                       |       |      |            |         |           | 31/41           | 12        | 12.5   | 0.5            | 0.605       | 0.003   | Fig. S3 |
|                       |       |      |            |         |           | 32/41           | 16        | 14.7   | 1.3            | 0.729       | 0.001   | Fig. S3 |
|                       |       |      |            |         |           | 29/39           | 20        | 17.5   | 2.5            | 0.897       | 0.001   | Fig. S3 |

The "Peak" indicates as used peaks number ("Used") over associated oscillatory peaks in the samples ("All"). "ZT/CT" indicates environmental time in ZT (LD conditions) or CT (DD conditions) when the sample was taken. The "Difference" is determined as follows: BT - (environmental time). See [Table S3](#) for used oscillatory peaks information (metabolite timetable). See also *Materials and Methods* for details. LD; light-dark, DD; constant dark, ZT; zeitgeber time, CT; circadian time.
